# Supplementary material for: Enantioselective formal synthesis of (+)-madangamine A
Source: Royal Society of Chemistry journal article supplement (doi:10.1039/c9cc03690c), 2019-01-01
Supplement: c9cc03690c1.pdf [file c9cc03690c1.pdf]

## Enantioselective Formal Synthesis of (+)-Madangamine A

Celeste Are, Maria Pérez, Joan Bosch, and Mercedes Amat\*

### Supporting Information Available

- I) Experimental procedures and spectroscopic data: pages S2-S18
- II) Copies of  $^1\text{H}$  and  $^{13}\text{C}$  NMR spectra and HRMS: pages S19-S37

## General Experimental Information

All air sensitive reactions were performed under a dry argon or nitrogen atmosphere with dry, freshly distilled solvents using standard procedures. Evaporation of solvent was accomplished with a rotatory evaporator. Thin-layer chromatography was done on SiO<sub>2</sub> (silica gel 60 F<sub>254</sub>), and the spots were located by UV light and a 1% KMnO<sub>4</sub> solution. Chromatography refers to flash column chromatography and was carried out on SiO<sub>2</sub> (silica gel 60, 230-400 mesh). Unless otherwise indicated, NMR spectra were recorded at 400 MHz (<sup>1</sup>H) and 100.6 MHz (<sup>13</sup>C), and chemical shifts are reported in  $\delta$  values, in parts per million (ppm) relative to Me<sub>4</sub>Si (0 ppm) or relative to residual chloroform (7.26 ppm, 77.0 ppm) as an internal standard. Data are reported in the following manner: chemical shift, multiplicity, coupling constant (*J*) in hertz (Hz), integrated intensity, and assignment (when possible). Assignments and stereochemical determinations are given only when they are derived from definitive two-dimensional NMR experiments (*g*-HSQC-COSY). IR spectra were performed in a spectrophotometer Nicolet Avatar 320 FT-IR and only noteworthy IR absorptions (cm<sup>-1</sup>) are listed. Optical rotations were measured on a Perlin-Elmer 241 polarimeter.  $[\alpha]_D$  values are given in 10<sup>-1</sup> deg cm<sup>2</sup> g<sup>-1</sup>. High resolution mass spectra (HMRS) were performed by *Centres Científics i Tecnològics de la Universitat de Barcelona*.

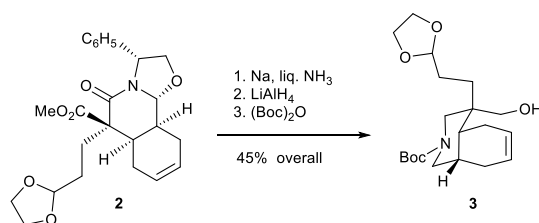

**(4*R*,4*aR*,8*aS*)-2-(*tert*-Butoxycarbonyl)-4-[2-(1,3-dioxolan-2-yl)ethyl]-4-(hydroxymethyl)-**

**1,2,3,4,4*a*,5,8,8*a*-octahydroisoquinoline (3):** *First step:* Liquid ammonia (15 mL) was condensed at  $-78\text{ }^{\circ}\text{C}$  in a three-necked, 100 mL round-bottomed flask equipped with a coldfinger condenser charged with dry ice-acetone, and then a solution of lactam **2** (214 mg, 0.50 mmol) in anhydrous THF (3 mL) was added. The temperature was raised to  $-33\text{ }^{\circ}\text{C}$  and sodium metal was added in small portions until the blue color persisted. The mixture was stirred at  $-33\text{ }^{\circ}\text{C}$  for 2 min. The reaction was quenched by the addition of solid NH<sub>4</sub>Cl until the blue color disappeared, and the mixture was stirred at room temperature for 4h. The residue was digested at room temperature with CH<sub>2</sub>Cl<sub>2</sub>, and the resulting suspension was filtered through Celite®. The solution was concentrated under reduced pressure. *Second step:* The resulting residue was added under an argon atmosphere to a solution of LiAlH<sub>4</sub> (278 mg, 7.35 mmol) in anhydrous dioxane (17 mL), and the mixture was stirred at reflux overnight. The reaction was quenched with water and 10% aqueous NaOH. The aqueous layer was extracted with EtOAc, and the combined organic extracts were dried over anhydrous MgSO<sub>4</sub>, filtered, and concentrated to give a crude amino alcohol, which was used in the next step without purification. *Third step:* Boc<sub>2</sub>O (119 mg, 0.55 mmol) was added dropwise under an inert atmosphere at room temperature to a solution of the above amino alcohol in anhydrous CH<sub>2</sub>Cl<sub>2</sub> (8 mL), and the resulting mixture was stirred for 20 h. The solution was poured into saturated aqueous NH<sub>4</sub>Cl and extracted with CH<sub>2</sub>Cl<sub>2</sub>. The combined organic extracts were washed with brine, dried over anhydrous MgSO<sub>4</sub>, filtered, and concentrated. Flash chromatography (9:1 to 1:1 hexane-EtOAc) of the residue gave compound **3** (83 mg, 45% overall yield) as a white foam:  $[\alpha]_{\text{D}}^{22} = -8.34$  (*c* 0.44 in CHCl<sub>3</sub>); IR (film):  $\nu = 3479$  (OH), 1681 (CO) cm<sup>-1</sup>;  $\delta_{\text{H}}$  (400 MHz; CDCl<sub>3</sub>; Me<sub>4</sub>Si, COSY, HSQC, rotamers) 1.45 [9 H, s, (CH<sub>3</sub>)<sub>3</sub>C], 1.58-1.76 (4 H, m, H-1', H-2'), 1.78-1.96 (2 H, m, H-8, H-4*a*), 1.98-2.30 (4 H, m, H-5, H-8, H-8*a*), 2.67-2.77 (2 H, m, H-1, H-3), 3.42 (2 H, s, CH<sub>2</sub>OH), 3.59-3.62 (2 H, m, H-1, H-3), 3.85-3.98 (4 H, 2m, OCH<sub>2</sub>CH<sub>2</sub>O), 4.87 (1 H, t, *J* = 4.8 Hz, H-3'), 5.60 (2 H, m, H-6, H-7);  $\delta_{\text{C}}$  (100.6 MHz; CDCl<sub>3</sub>; Me<sub>4</sub>Si, rotamers) 21.6 (C-5), 24.0 (C-1'), 27.2 (C-2'), 27.9 (c-8*a*), 28.4 [C-8, (CH<sub>3</sub>)C], 34.2 (C-4*a*), 45.4 (C-1, C-3), 68.2 (CH<sub>2</sub>OH), 64.9 (OCH<sub>2</sub>CH<sub>2</sub>O), 79.5 [(CH<sub>3</sub>)C], 104.7 (C-3'), 124.8 (C-6, C-7); HRMS (ESI) calcd for [C<sub>20</sub>H<sub>33</sub>NO<sub>5</sub> + Na]<sup>+</sup>: 390.2251, found: 390.2263.

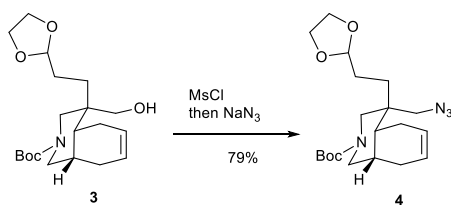

**(4R,4aR,8aS)-4-(Azidomethyl)-2-(tert-butoxycarbonyl)-4-[2-(1,3-dioxolan-2-yl)ethyl]-**

**1,2,3,4,4a,5,8,8a-octahydroisoquinoline (4):** *First Step:* Anhydrous Et<sub>3</sub>N (0.52 mL, 3.75 mmol) and methanesulfonyl chloride (0.29 mL, 3.75 mmol) were added at 0 °C under an inert atmosphere to a stirred solution of alcohol **3** (458 mg, 1.25 mmol) in anhydrous CH<sub>2</sub>Cl<sub>2</sub> (21 mL), and the resulting mixture was stirred at room temperature for 4 h. The reaction was quenched with a saturated aqueous NH<sub>4</sub>Cl solution and the mixture was extracted with CH<sub>2</sub>Cl<sub>2</sub>. The combined organic extracts were dried over anhydrous MgSO<sub>4</sub>, filtered, and concentrated to give the mesylate as a yellow oil, which was used in the next step without purification. *Second Step:* NaN<sub>3</sub> (471 mg, 7.25 mmol) was added under an inert atmosphere to a solution of the above mesylate in anhydrous DMF (3.6 mL) and the mixture was heated to 90 °C. After 48 h, more NaN<sub>3</sub> (471 mg, 7.25 mmol) was added and the resulting mixture was stirred at 90 °C for an additional 48 h. The reaction was quenched with distilled water and the aqueous phase was extracted with CH<sub>2</sub>Cl<sub>2</sub>. The organic extracts were dried over anhydrous MgSO<sub>4</sub>, filtered, and concentrated under reduced pressure. Flash chromatography (hexane to 9:1 hexane-EtOAc) of the resulting oil gave azide **4** (387mg, 79%) as a pale yellow oil: [α]<sub>D</sub><sup>22</sup> = – 35.18 (c 0.6 in CHCl<sub>3</sub>); IR (film): ν = 2100 (N<sub>3</sub>), 1693 (CO) cm<sup>-1</sup>; δ<sub>H</sub> (400 MHz; CDCl<sub>3</sub>; Me<sub>4</sub>Si, COSY, HSQC, rotamers) 1.42 [9 H, s, (CH<sub>3</sub>)<sub>3</sub>C], 1.49-1.59 (2 H, m, H-1', H-5), 1.64-1.71 (2 H, m, H-1', H-5), 1.75-1.85 (2 H, m, H-8), 1.90-1.98 (1 H, m, H-4a), 2.00-2.07 (1 H, m, H-2'), 2.11-2.24 (2 H, m, H-8a, H-2'), 2.59-2.70 (2 H, m, H-1, H-3), 3.17 (2 H, s, CH<sub>2</sub>N<sub>3</sub>), 3.53-3.61 (2 H, m, H-1, H-3), 3.81-3.92 (4 H, 2m, OCH<sub>2</sub>CH<sub>2</sub>O), 4.88 (1 H, t, J = 4.8 Hz, H-3'), 5.56 (2 H, m, H-6, H-7); δ<sub>C</sub> (100.6 MHz; CDCl<sub>3</sub>; Me<sub>4</sub>Si, rotamers) 21.5 (C-2'), 25.7 (C-1'), 27.7 (C-8a), 27.8 (C-5), 28.3 [(CH<sub>3</sub>)<sub>3</sub>C, C-8], 34.7 (C-4a), 39.7 (C-4), 43.3, 44.1, 44.4, 44.9 (C-3, C-1), 53.9 (CH<sub>2</sub>N<sub>3</sub>), 64.8 (OCH<sub>2</sub>CH<sub>2</sub>O), 79.6 [(CH<sub>3</sub>)<sub>3</sub>C], 104.6 (C-3'), 123.9, 124.5 (C-6, C-7), 154.9 (NCOO); HRMS (ESI) calcd for [C<sub>20</sub>H<sub>32</sub>N<sub>4</sub>O<sub>4</sub> + Na]<sup>+</sup>: 415.2316, found: 415.2334.

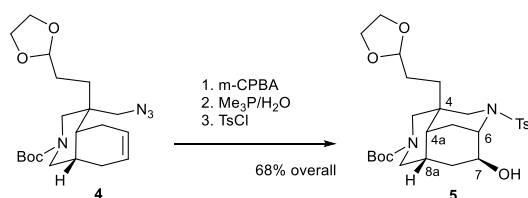

**(4*R*,4*aR*,6*S*,7*S*,8*aS*)-2-(*tert*-Butoxycarbonyl)-4-[2-(1,3-dioxolan-2-yl)ethyl]-7-hydroxy-6,4-**

**(iminomethano)-9-(*p*-toluenesulfonyl)perhydroisoquinoline (5):** *First step:* *m*-CPBA (317 mg, 1.41 mmol,  $\leq$  77% of purity) was added to a cold (0 °C) solution of azide **4** (327 mg, 0.83 mmol) in CH<sub>2</sub>Cl<sub>2</sub>, and the mixture was allowed to warm slowly to room temperature. After 5 h, a solution of saturated aqueous NaHCO<sub>3</sub> and Na<sub>2</sub>S<sub>2</sub>O<sub>3</sub> (1:1) was added, and the resulting mixture was stirred for an additional 45 minutes. The mixture was extracted with CH<sub>2</sub>Cl<sub>2</sub>, and the combined organic extracts were washed with a 10% aqueous Na<sub>2</sub>SO<sub>3</sub>, dried over anhydrous MgSO<sub>4</sub>, filtered, and concentrated under reduced pressure to give the azido epoxide intermediate, which was used in the next step without purification. *Second step:* Me<sub>3</sub>P (1.33 mL of a 1 M solution in THF, 1.33 mmol) was added to a solution of the above azido epoxide in THF (16 mL) and water (1.6 mL), and the resulting mixture was stirred at room temperature overnight and concentrated to afford the diazatricyclic alcohol derivative. *Third step:* Et<sub>3</sub>N (0.12 mL, 0.83 mmol) was added dropwise at 0 °C under an inert atmosphere to a stirring solution of the above aminoalcohol in anhydrous CH<sub>2</sub>Cl<sub>2</sub> (14 mL). A solution of *p*-toluenesulfonyl chloride (158 mg, 0.83 mmol) in anhydrous CH<sub>2</sub>Cl<sub>2</sub> (1.4 mL) was added, and the stirring was continued at 0 °C for 2.5 h. A saturated aqueous NH<sub>4</sub>Cl solution was added and the aqueous layer was extracted with CH<sub>2</sub>Cl<sub>2</sub>. The combined organic extracts were dried over anhydrous MgSO<sub>4</sub>, filtered, and concentrated under reduced pressure. Flash chromatography (9:1 to 1:1 hexane-EtOAc) of the residue afforded the protected tricyclic compound **5** (302 mg, 68%) as a pale yellow oil:  $[\alpha]_D^{22} = +24.01$  (*c* 3.15 in CHCl<sub>3</sub>); IR (film):  $\nu = 3444$  (OH), 1693 (CO) cm<sup>-1</sup>;  $\delta_H$  (400 MHz; CDCl<sub>3</sub>; Me<sub>4</sub>Si, COSY, HSQC, rotamers) 1.35, 1.41 [13 H, m, (CH<sub>3</sub>)<sub>3</sub>C, H-1', H-2'], 1.45 (1 H, m, H-4a), 1.59-1.64 (3 H, m, 2H-8, H-5), 1.94 (1 H, dt, *J* = 13.6, 2.8 Hz, H-5), 1.97 (m, 1H, H-8a), 2.33 (3 H, s, CH<sub>3</sub>-Ts), 2.60-2.78 (2 H, m, H-1, H-3), 3.03 (1 H, d, *J* = 12.8 Hz, H-10), 3.24 (1 H, d, *J* = 13.2 Hz, H-10), 3.76 (2 H, m, CH<sub>2</sub>O), 3.83 (1 H, masked, H-7), 3.86 (2 H, m, CH<sub>2</sub>O), 3.90 (2 H, masked, H-1, H-3), 3.96 (1 H, s, H-6), 4.60 (1 H, s, H-3'), 7.22 (2 H, d, *J* = 8.4 Hz, H-Ts), 7.64 (2 H, d, *J* = 8.4 Hz, H-Ts);  $\delta_C$  (100.6 MHz; CDCl<sub>3</sub>; Me<sub>4</sub>Si, rotamers) 21.1 (CH<sub>3</sub>-Ts), 21.9 (C-5), 27.3 (C-1'), 28.2 [(CH<sub>3</sub>)C], 29.4 (C-2'), 30.7 (8a), 32.3 (C-8), 32.4 (C-4), 35.2 (C-4a), 46.8 (C-10), 50.8 (C-6), 48.4-49.6 (C-1, C-3), 64.8 (2CH<sub>2</sub>O), 67.3 (C-7), 80.0 [(CH<sub>3</sub>)C], 104.4 (C-3'), 127.0 (CH-Ts), 129.9 (CH-Ts), 137.6 (C-Ts), 143.1 (C-Ts), 155.4 (NCOO); HRMS calcd for [C<sub>27</sub>H<sub>40</sub>N<sub>2</sub>O<sub>7</sub>S + Na]<sup>+</sup>: 559.2448, found: 559.2435.

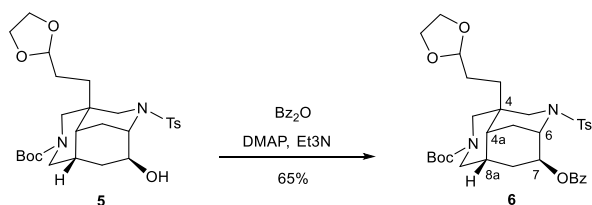

**(4*R*,4*aR*,6*S*,7*S*,8*aS*)-7-(Benzoyloxy)-2-(*tert*-butoxycarbonyl)-4-[2-(1,3-dioxolan-2-yl)ethyl]-6,4-(iminomethano)-9-(*p*-toluenesulfonyl)perhydroisoquinoline (**6**):** Triethylamine (40  $\mu$ L, 0.296 mmol) and DMAP (2.4 mg, 0.02 mmol) were added under an inert atmosphere to a stirred solution of tricyclic compound **5** (56 mg, 0.099 mmol) in anhydrous  $\text{CH}_2\text{Cl}_2$  (2.5 mL). After 30 minutes, benzoic anhydride (34 mg, 0.15 mmol) was added and the resulting mixture was stirred at room temperature overnight. The reaction was quenched by the addition of saturated aqueous  $\text{NH}_4\text{Cl}$  and the aqueous layer was extracted with  $\text{CH}_2\text{Cl}_2$ . The combined organic extracts were dried over anhydrous  $\text{MgSO}_4$ , filtered, and concentrated under reduced pressure. Flash chromatography (9:1 to 1:1 hexane-EtOAc) of the residue afforded tricyclic compound **6** (40 mg, 65%) as a white foam: IR (film):  $\nu = 1714$  (CO), 1682 (CO)  $\text{cm}^{-1}$ ;  $\delta_{\text{H}}$  (400 MHz;  $\text{CDCl}_3$ ;  $\text{Me}_4\text{Si}$ , COSY, HSQC, rotamers) 1.37-1.54 [13 H, m, H-1', H-2',  $(\text{CH}_3)_3\text{C}$ ], 1.56-1.70 (2 H, m, H-4a, H-8), 1.72-1.81 (1 H, m, H-8), 1.94 (2 H, s, H-5), 2.05 (1 H, s, H-8a), 2.42 (3 H, s,  $\text{CH}_3$ -Ts), 2.58-2.88 (2 H, m, H-1, H-3), 3.05 (1 H, d,  $J = 11.6$  Hz, H-10), 3.51 (1 H, d,  $J = 13.2$  Hz, H-10), 3.73-3.89 (2 H, masked, H-1, H-3), 3.85, 3.96 (4 H, 2m,  $2\text{CH}_2\text{O}$ ), 4.28 (1 H, s, H-6), 4.76 (1 H, s, H-3'), 5.06 (1 H, s, H-7), 7.31 (2 H, d,  $J = 7.6$  Hz, H-Ts), 7.45 (2 H, t,  $J = 7.6$  Hz,  $\text{C}_6\text{H}_5$ ), 7.57 (1 H, t,  $J = 7.2$  Hz,  $\text{C}_6\text{H}_5$ ), 7.81 (2 H, d,  $J = 8.0$  Hz, H-Ts), 8.01 (2 H, d,  $J = 7.6$  Hz,  $\text{C}_6\text{H}_5$ );  $\delta_{\text{C}}$  (100.6 MHz;  $\text{CDCl}_3$ ;  $\text{Me}_4\text{Si}$ , rotamers) 21.5 ( $\text{CH}_3$ -Ts), 23.7 (C-5), 27.6 (C-1'), 28.3 [ $(\text{CH}_3)_3\text{C}$ , C-2'], 29.7 (C-8), 30.0 (C-8a), 31.1 (C-4), 34.8 (C-4a), 47.0 (C-10), 48.1 (C-6), 49.3-49.8 (C-1, C-3), 64.9 ( $2\text{CH}_2\text{O}$ ), 69.2 (C-7), 79.9 [ $(\text{CH}_3)_3\text{C}$ ], 104.3 (C-4'), 127.1 (CH-Ts), 128.4 ( $\text{C}_6\text{H}_5$ ), 129.5 ( $\text{C}_6\text{H}_5$ ), 129.7 (CH-Ts), 133.1 ( $\text{C}_6\text{H}_5$ ), 137.0 (C-Ts), 143.2 (C-Ts), 155.3 (NCOO), 164.9 (COO); HRMS calcd for  $[\text{C}_{34}\text{H}_{44}\text{N}_2\text{O}_8\text{S} + \text{H}]^+$ : 641.2891, found: 641.2877.

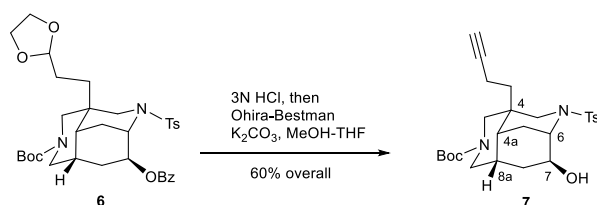

**(4*R*,4*aR*,6*S*,7*S*,8*aS*)-2-(*tert*-Butoxycarbonyl)-4-(3-butynyl)-7-hydroxy-6,4-(iminomethano)-9-**

**(*p*-toluenesulfonyl)perhydroisoquinoline (**7**):** *First step:* A 3 N aqueous solution of HCl (3.3 mL, 9.9 mmol) was added to a solution of compound **6** (122 mg, 0.19 mmol) in THF (3.3 mL) and the mixture was stirred at room temperature for 2 hours. Saturated aqueous K<sub>2</sub>CO<sub>3</sub> was added until pH 8, and the mixture was extracted with CH<sub>2</sub>Cl<sub>2</sub>. The combined organic extracts were washed with brine, dried over anhydrous MgSO<sub>4</sub>, filtered, and concentrated to give the intermediate aldehyde, which was used in the next step without purification. *Second step:* K<sub>2</sub>CO<sub>3</sub> (50 mg, 0.36 mmol) and Bestmann reagent (34 μL, 0.22 mmol) were successively added under an inert atmosphere at room temperature to a solution of the above aldehyde in THF/MeOH (7 mL, 1:1), and the mixture was stirred at room temperature overnight. The mixture was then filtered through a Celite® pad, and the organic solvent was evaporated under reduced pressure. The residue was dissolved in CH<sub>2</sub>Cl<sub>2</sub> and the resulting solution was washed with 5% aqueous NaHCO<sub>3</sub> and brine. The organic layer was dried over anhydrous MgSO<sub>4</sub>, filtered, and concentrated under reduced pressure. Flash chromatography (hexane to 7:3 hexane-EtOAc) of the residue gave alkyne **7** (56 mg, 60%) as a pale yellow foam: [α]<sub>D</sub><sup>22</sup> = +32.56 (c 1.5 in CHCl<sub>3</sub>); δ<sub>H</sub> (400 MHz; CDCl<sub>3</sub>; Me<sub>4</sub>Si, COSY, HSQC, rotamers) 1.43 [9 H, m, (CH<sub>3</sub>)<sub>3</sub>C], 1.49-1.58 (4 H, m, H-8a, 2H-1', H-8), 1.68 (1 H, d, *J* = 12.0 Hz, H-5), 1.91-2.09 (5 H, m, H-4a, H-4', H-5, 2H-2'), 2.41 (3 H, s, CH<sub>3</sub>-Ts), 2.45-2.56 (1 H, m, H-8), 2.62-2.85 (2 H, m, H-1, H-3), 3.11 (1 H, m, H-10), 3.32 (1 H, s, H-10), 3.70-3.94 (3 H, m, H-1, H-3, H-7), 4.00 (1 H, s, H-6), 7.28 (2 H, d, *J* = 8.1 Hz, H-Ts), 7.70 (2 H, d, *J* = 8.2 Hz, H-Ts); δ<sub>C</sub> (100.6 MHz; CDCl<sub>3</sub>; Me<sub>4</sub>Si, rotamers) 12.7 (C-2'), 21.5 (CH<sub>3</sub>-Ts), 22.5 (C-5), 28.2 [(CH<sub>3</sub>)C], 30.4 (C-4a), 32.2 (C-4), 34.9 (C-8), 35.3 (C-8a, C-1'), 46.5 (C-10), 48.8-49.6 (C-1, C-3), 50.9 (C-6), 67.5 (C-7), 69.0 (C-4'), 79.9 [(CH<sub>3</sub>)C], 126.8 (CH-Ts), 129.8 (CH-Ts), 137.3 (C-Ts), 143.3 (C-Ts), 155.4 (NCOO); HRMS calcd for [C<sub>26</sub>H<sub>36</sub>N<sub>2</sub>O<sub>5</sub>S + H]<sup>+</sup>: 489.2418, found: 489.2401.

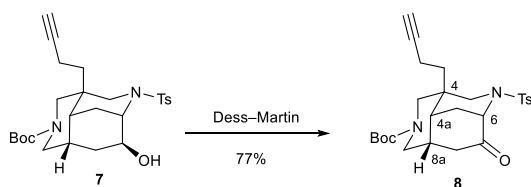

**(4*R*,4*aR*,6*S*,8*aS*)-2-(*tert*-Butoxycarbonyl)-4-(3-butynyl)-6,4-(iminomethano)-7-oxo-9-(*p*-**

**toluenesulfonyl)perhydroisoquinoline (8):** Dess–Martin periodinane (41 mg, 0.08 mmol) was added at 0 °C to a solution of tricyclic alcohol **7** in CH<sub>2</sub>Cl<sub>2</sub> (5 mL), and the resulting mixture was stirred at room temperature for 4 h. The solution was poured into a saturated aqueous solution of NaHCO<sub>3</sub> and Na<sub>2</sub>S<sub>2</sub>O<sub>3</sub> (1:1), and the mixture was stirred for an hour at room temperature. The layers were separated, and the aqueous phase was extracted with CH<sub>2</sub>Cl<sub>2</sub>. The combined organic extracts were dried over anhydrous MgSO<sub>4</sub>, filtered, and concentrated under reduced pressure. Flash chromatography (hexane to 8:2 hexane-EtOAc) of the residue gave ketone **8** (30 mg, 77%) as a pale yellow foam:  $[\alpha]_D^{22} = +10.66$  (*c* 1.5 in CHCl<sub>3</sub>);  $\delta_H$  (400 MHz; CDCl<sub>3</sub>; Me<sub>4</sub>Si, COSY, HSQC, rotamers) 1.28-1.45 [9 H, m, (CH<sub>3</sub>)<sub>3</sub>C], 1.70 (3 H, m, H-5, H-8a, H-8), 1.79-1.98 (2 H, m, H-1'), 2.09-2.18 (2 H, m, H-4a, H-4'), 2.19-2.27 (2 H, m, H-2'), 2.38 (3 H, s, CH<sub>3</sub>-Ts), 2.37 (1 H, masked, H-8), 2.41-2.50 (1 H, m, H-5), 2.68-2.93 (3 H, m, H-1, H-3, H-10), 3.59 (1 H, d, *J* = 12.5 Hz, H-10), 3.71-4.01 (2 H, m, H-1, H-3), 4.37 (1 H, s, H-6), 7.24 (2 H, d, *J* = 8.1 Hz, H-Ts), 7.60 (2 H, d, *J* = 8.2 Hz, H-Ts);  $\delta_C$  (100.6 MHz; CDCl<sub>3</sub>; Me<sub>4</sub>Si, rotamers) 12.9 (C-2'), 21.5 (CH<sub>3</sub>-Ts), 28.2 [(CH<sub>3</sub>)<sub>3</sub>C], 29.3 (C-5), 34.1 (C-8a, C-1'), 35.8 (C-4a), 36.5 (C-4), 43.3 (C-8), 46.9 (C-10), 56.8 (C-6), 48.4-50.1 (C-1, C-3), 69.5 (C-4'), 80.2 [(CH<sub>3</sub>)<sub>3</sub>C], 127.7 (CH-Ts), 129.5 (CH-Ts), 134.2 (C-Ts), 143.3 (C-Ts), 155.2 (NCOO), 204.9 (C-7); HRMS calcd for [C<sub>26</sub>H<sub>34</sub>N<sub>2</sub>O<sub>5</sub>S + Na]<sup>+</sup>: 509.2081, found: 509.2086.



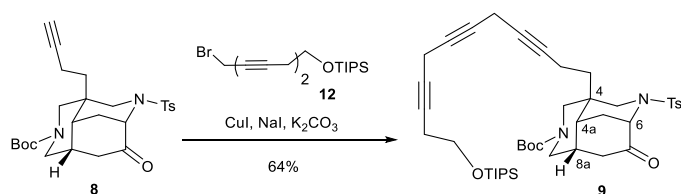

**(4*R*,4*aR*,6*S*,8*aS*) Triyne intermediate (9):** Alkyne **8** (31 mg, 0.063 mmol) and bromo derivative **12** (45 mg, 0.127 mmol) were added at room temperature under an inert atmosphere to a suspension of CuI (24 mg, 0.127 mmol), NaI (19 mg, 0.127), and K<sub>2</sub>CO<sub>3</sub> (13 mg, 0.095 mmol) in anhydrous DMF (2 mL). The mixture was stirred overnight at room temperature. Saturated aqueous NH<sub>4</sub>Cl and EtOAc were added, and the resulting mixture was filtered through a Celite<sup>®</sup> pad. The layers were separated, and the aqueous phase was extracted with Et<sub>2</sub>O. The combined organic extracts were washed with brine, dried over anhydrous Na<sub>2</sub>SO<sub>4</sub>, filtered, and concentrated under reduced pressure. Flash chromatography (hexane to 8:2 hexane-EtOAc) of the residue gave triyne **9** (31 mg, 64%) as an oil:  $[\alpha]_D^{22} = +5.59$  (*c* 1.5 in CHCl<sub>3</sub>);  $\delta_H$  (400 MHz; CDCl<sub>3</sub>; Me<sub>4</sub>Si, COSY, HSQC, rotamers) 1.07 [21 H, s, (CH<sub>3</sub>)<sub>2</sub>CH], 1.37 [9 H, m, (CH<sub>3</sub>)<sub>3</sub>C], 1.67 (2 H, m, H-8, H-5), 1.77 (1 H, s, H-8a), 1.87 (2 H, m, H-1'), 2.11-2.23 (3 H, m, H-4a, H-2'), 2.36 (3 H, s, CH<sub>3</sub>-Ts), 2.39-2.49 (4 H, m, H-5, H-8, H-11'), 2.71-2.82 (3 H, m, H-10, H-1, H-3), 3.13 (4 H, s, 2H-5', 2H-8'), 3.56 (1 H, d, *J* = 12.9 Hz, H-10), 3.78 (2 H, t, *J* = 8.2 Hz, H-12'), 3.75-3.93 (2 H, m, H-1, H-3), 4.37 (1 H, s, H-6), 7.24 (2 H, d, *J* = 8.1 Hz, H-Ts), 7.59 (2 H, d, *J* = 8.2 Hz, H-Ts);  $\delta_C$  (100.6 MHz; CDCl<sub>3</sub>; Me<sub>4</sub>Si, rotamers) 9.8 (C-5', C-8'), 12.0 [(CH<sub>3</sub>)<sub>2</sub>CH], 13.2 (C-2'), 17.9 [(CH<sub>3</sub>)<sub>2</sub>CH], 21.4 (CH<sub>3</sub>-Ts), 23.1 (C-11'), 28.4 [(CH<sub>3</sub>)<sub>3</sub>C], 29.4 (C-5), 31.4 (C-4), 33.6 (C-8a), 34.1 (C-1'), 36.2 (C-4a), 43.1 (C-8), 47.0 (C-10), 48.1-51.0 (C-1, C-3), 56.9 (C-6), 62.2 (C-12'), 74.4, 74.8, 75.0, 75.3, 77.7, 79.5 (C-3', C-4', C-6', C-7', C-9', C-10'), 80.2 [(CH<sub>3</sub>)<sub>3</sub>C], 127.7 (CH-Ts), 129.5 (CH-Ts), 134.4 (C-Ts), 143.9 (C-Ts), 155.0 (NCOO), 204.9 (C-7); HRMS calcd for [C<sub>43</sub>H<sub>62</sub>N<sub>2</sub>O<sub>6</sub>SSi + Na]<sup>+</sup>: 785.399, found: 785.3992.



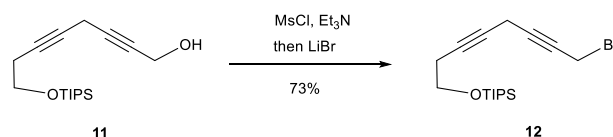

**1-Bromo-8-[(triisopropylsilyl)oxy]-2,5-octadiyne (12):** *First step:* Triethylamine (610  $\mu$ L, 4.38 mmol), and methanesulfonyl chloride (454  $\mu$ L, 5.84 mmol) were added dropwise at 0 °C under an inert atmosphere to a solution of alcohol **11** (860 mg, 2.92 mmol) in anhydrous CH<sub>2</sub>Cl<sub>2</sub> (50 mL). The mixture was stirred at 0 °C for 15 min and between 10 and 20 °C for 1.5 h. Saturated aqueous NH<sub>4</sub>Cl was added, and the mixture was extracted with CH<sub>2</sub>Cl<sub>2</sub>. The combined organic extracts were washed with water, dried over anhydrous Na<sub>2</sub>SO<sub>4</sub>, filtered, and concentrated under reduced pressure to afford the mesylate, which was used in the next step without purification. *Second step:* A solution of LiBr (2.5 g, 4.38 mmol) in anhydrous THF (20 mL) was added under an inert atmosphere at 0 °C to a solution of the above mesylate (2.92 mmol) in anhydrous CH<sub>2</sub>Cl<sub>2</sub> (15 mL). The mixture was stirred at room temperature overnight. Water was added, and the mixture was extracted with CH<sub>2</sub>Cl<sub>2</sub>. The combined organic extracts were dried over anhydrous Na<sub>2</sub>SO<sub>4</sub>, filtered, and concentrated under reduced pressure. Flash chromatography (hexane to 7:3 hexane-EtOAc) of the residue afforded bromo derivative **12** (760 mg, 73%) as an oil:  $\delta_{\text{H}}$  (400 MHz; CDCl<sub>3</sub>; Me<sub>4</sub>Si, COSY, HSQC) 1.05, 1.06 [21 H, 2s, (CH<sub>3</sub>)<sub>2</sub>CH], 2.41 (2 H, m,  $J$  = 6.8, 2.4 Hz, H-7), 3.20 (2 H, t,  $J$  = 2.4 Hz, H-4), 3.78 (2 H, t,  $J$  = 7.2 Hz, H-8), 3.90 (2 H, t,  $J$  = 2.4 Hz, H-1);  $\delta_{\text{C}}$  (100.6 MHz; CDCl<sub>3</sub>; Me<sub>4</sub>Si) 10.1 (C-5), 12.0 [(CH<sub>3</sub>)<sub>2</sub>CH], 14.7 (C-8), 17.9 [(CH<sub>3</sub>)<sub>2</sub>CH], 23.1 (C-7), 62.1 (C-8), 74.0 (C-5), 75.3 (C-3), 78.3 (C-2), 81.8 (C-6); HRMS (ESI) calcd for [C<sub>17</sub>H<sub>29</sub>BrOSi + H]<sup>+</sup>: 357.1244, found: 357.1232.

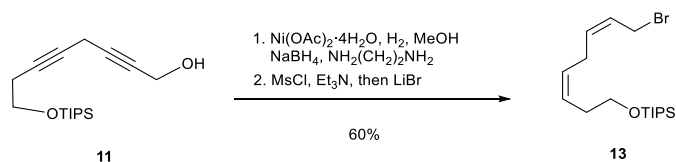

**(2Z,5Z)-1-Bromo-8-[(triisopropylsilyl)oxy]-2,5-octadiene (13):** *First step:* Ethylenediamine (0.83 mL, 12.42 mmol) was added at room temperature under an argon atmosphere to a solution of Ni(OAc)<sub>2</sub>·4H<sub>2</sub>O (2.31 g, 9.28 mmol) and NaBH<sub>4</sub> (413 mg, 10.9 mmol) in anhydrous MeOH (185 mL). Then, diene **11** (1.68 g, 5.45 mmol) in anhydrous MeOH (20 mL) was added and the argon atmosphere was replaced with hydrogen. The mixture was vigorously stirred for one hour and filtered through a Celite® pad. The filtrate was concentrated under reduced pressure. The residue was dissolved in CH<sub>2</sub>Cl<sub>2</sub>, and the solution was washed with brine, dried over anhydrous MgSO<sub>4</sub>, and concentrated to give the corresponding diene, which was used in the next step without purification. *Second step:* Methanesulfonyl chloride (0.51 mL, 6.55 mmol) and Et<sub>3</sub>N (1.1 mL, 7.64 mmol) were added under an inert atmosphere at 0 °C to a solution of the above diene in anhydrous CH<sub>2</sub>Cl<sub>2</sub> (14 mL), and the mixture was stirred at room temperature for 3 hours. The reaction was quenched by the addition of saturated aqueous NH<sub>4</sub>Cl and the mixture was extracted with CH<sub>2</sub>Cl<sub>2</sub>. The combined organic extracts were dried over anhydrous MgSO<sub>4</sub>, filtered, and concentrated to give the mesylate, which was used in the next step without further purification. *Third step:* A solution of LiBr (4.73 g, 54.5 mmol) in anhydrous THF (23 mL) was added at 0 °C under an inert atmosphere to a solution of the above mesylate in anhydrous CH<sub>2</sub>Cl<sub>2</sub> (17 mL). The resulting mixture was stirred at room temperature overnight. Distilled water was added, and the mixture was then extracted with CH<sub>2</sub>Cl<sub>2</sub>. The combined organic extracts were dried over anhydrous Na<sub>2</sub>SO<sub>4</sub> and filtered, and the solvent was removed under reduced pressure. Flash chromatography (hexane to 98:2 hexane-EtOAc) of the residue afforded bromo derivative **13** (1.18 g, 60%) as an oil: δ<sub>H</sub> (400 MHz; CDCl<sub>3</sub>; Me<sub>4</sub>Si, COSY, HSQC) 1.06, 1.07 [21 H, 2s, (CH<sub>3</sub>)<sub>2</sub>CH], 2.36 (2 H, m, H-2), 2.85 (2 H, t, *J* = 6.8 Hz, H-5), 3.70 (2 H, t, *J* = 6.4 Hz, H-1), 4.04 (2 H, d, *J* = 6.8 Hz, H-8), 5.40-5.80 (4 H, m, H-5, H-6, H-2, H-3); δ<sub>C</sub> (100.6 MHz; CDCl<sub>3</sub>; Me<sub>4</sub>Si) 12.0 [(CH<sub>3</sub>)<sub>2</sub>CH], 18.0 [(CH<sub>3</sub>)<sub>2</sub>CH], 25.4 (C-4), 27.0 (C-1), 31.3 (C-7), 63.0 (C-8), 125.5, 127.5, 127.8, 133.9 (CH=).

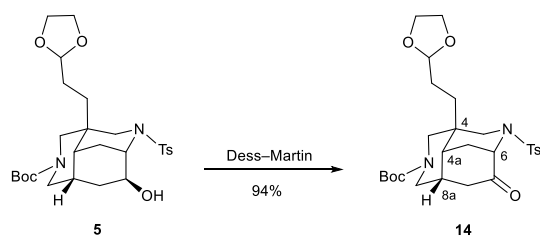

**(4*R*,4*aR*,6*S*,8*aS*)-2-(*tert*-Butoxycarbonyl)-4-[2-(1,3-dioxolan-2-yl)ethyl]-6,4-(iminomethano)-**

**9-(*p*-toluenesulfonyl)-7-oxoperhydroisoquinoline (**14**):** Dess–Martin periodinane (1.36 g, 3.21 mmol) was added to an ice-cold solution of alcohol **5** (574 mg, 1.08 mmol) in CH<sub>2</sub>Cl<sub>2</sub> (11 mL), and the resulting mixture was stirred at room temperature overnight. The reaction was quenched with the addition of a saturated aqueous solution of NaHCO<sub>3</sub> and Na<sub>2</sub>S<sub>2</sub>O<sub>3</sub> (1:1), and the resulting mixture was stirred for an hour. The mixture was then extracted with CH<sub>2</sub>Cl<sub>2</sub>, and the combined organic extracts were dried over anhydrous MgSO<sub>4</sub>, filtered, and concentrated under reduced pressure. Flash chromatography (9:1 to 1:1 hexane–EtOAc) of the residue gave ketone **14** (538 mg, 94%) as a white foam:  $[\alpha]_D^{22} = +11.5$  (*c* 0.59 in CHCl<sub>3</sub>); IR (film):  $\nu = 1685$  (CO) cm<sup>-1</sup>;  $\delta_H$  (400 MHz; CDCl<sub>3</sub>; Me<sub>4</sub>Si, COSY, HSQC, rotamers) 1.32–1.41 [11 H, m, (CH<sub>3</sub>)<sub>3</sub>C, H-1′], 1.54–1.58 (2 H, m, H-2′), 1.63–1.72 (3 H, m, H-4*a*, H-8, H-5), 2.11 (1 H, s, H-8*a*), 2.29–2.35 (1 H, m, H-8), 2.37 (3 H, s, CH<sub>3</sub>-Ts), 2.42–2.48 (1 H, m, H-5), 2.59, 2.78 (3 H, br. s, H-1, H-3, H-10), 3.55, 3.76 (3 H, br.s, H-1, H-3, H-10), 3.86 (2 H, m, CH<sub>2</sub>O), 3.98 (2 H, m, CH<sub>2</sub>O), 4.35 (1 H, s, H-6), 4.85 (1 H, s, H-3′), 7.23 (2 H, d, *J* = 8.0 Hz, H-Ts), 7.59 (2 H, d, *J* = 8.0 Hz, H-Ts);  $\delta_C$  (100.6 MHz; CDCl<sub>3</sub>; Me<sub>4</sub>Si, rotamers) 21.4 (CH<sub>3</sub>-Ts), 27.5, 28.2, 29.1, 29.4 [C-5, C-2′, C-1′, (CH<sub>3</sub>)<sub>3</sub>C], 34.1 (C-4*a*), 36.3 (8*a*), 43.1 (C-8), 47.0 (C-10), 56.9 (C-6), 47.2–50.8 (C-1, C-3), 64.9 (2CH<sub>2</sub>O), 80.1 [(CH<sub>3</sub>)C], 104.1 (C-3′), 127.0 (CH-Ts), 129.8 (CH-Ts), 134.4 (C-Ts), 143.5 (C-Ts), 155.0 (NCOO), 205.1 (C-7); HRMS calcd for [C<sub>27</sub>H<sub>38</sub>N<sub>2</sub>O<sub>7</sub>S + NH<sub>4</sub>]<sup>+</sup>: 552.2738, found: 552.2736.

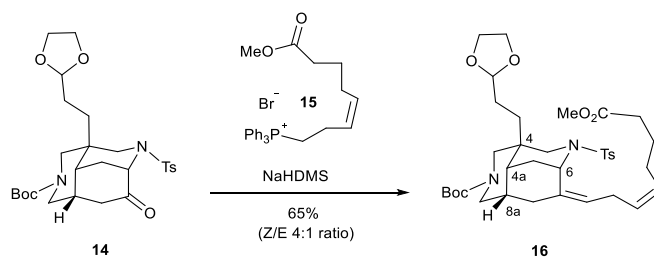

**(4*R*,4*aR*,6*S*,8*aS*) Tricyclic derivative (16):** Phosphonium salt **15** was dried by repeated dilution with anhydrous 1:1 THF-toluene and concentration under reduced pressure using a rotary evaporator with a dry ice condenser. Sodium bis(trimethylsilyl)amide (1.4 mL of a 1 M solution in THF, 1.4 mmol) was added under an inert atmosphere at 0 °C to a solution of the dry phosphonium salt **15** (548 mg, 1.1 mmol) in anhydrous THF (2.0 mL). After 1 h of stirring at this temperature, a solution of tricyclic ketone **14** (227 mg, 0.43 mmol) in anhydrous THF (3.0 mL) was added, and the resulting mixture was stirred at 0 °C for 1 h, at room temperature for 90 min, and at 60 °C for 3 h. The reaction was quenched with a saturated aqueous NH<sub>4</sub>Cl solution. The mixture was extracted with EtOAc, and the combined organic extracts were dried over anhydrous Na<sub>2</sub>SO<sub>4</sub>, filtered, and concentrated under reduced pressure. Flash chromatography (hexane to 6:4 hexane-EtOAc) of the residue gave an inseparable mixture of *Z/E* isomers of compound **16** (171 mg, *Z/E* 8:2 ratio, 65%): IR (film):  $\nu = 1737, 1693$  (CO) cm<sup>-1</sup>; Major isomer (spectral data from a mixture of isomers)  $\delta_{\text{H}}$  (400 MHz; CDCl<sub>3</sub>; Me<sub>4</sub>Si, COSY, HSQC, rotamers) 1.32-1.38 [10 H, m, H-5, (CH<sub>3</sub>)<sub>3</sub>C], 1.47-1.73 (7 H, m, H-2', H-1', H-6'', H-4a), 1.77-1.88 (1 H, m, H-8a), 1.92-1.99 (2 H, m, H-8), 2.02-2.05 (1 H, m, H-5''), 2.11-2.16 (1 H, m, H-5''), 2.22-2.33 (3 H, m, H-7'', H-5), 2.34 (3 H, s, CH<sub>3</sub>-Ts), 2.64 (2 H, br. s, H-1, H-3), 2.86 (2 H, m, H-10, H-2''), 2.98-3.05 (1 H, m, H-2''), 3.24-3.37 (1 H, m, H-10), 3.65 (3 H, s, OCH<sub>3</sub>), 3.83, 3.94 (6 H, 2s, 2CH<sub>2</sub>O, H-1, H-3 masked), 4.42, 4.95 (1 H, s, H-6), 4.79 (1 H, s, H-3'), 5.06 (1 H, t,  $J = 7.6$  Hz, H-1''), 5.28-5.29 (2 H, m, H-3'', H-4''), 7.16-7.20 (2 H, m, H-Ts), 7.57-7.61 (2 H, m, H-Ts);  $\delta_{\text{C}}$  (100.6 MHz; CDCl<sub>3</sub>; Me<sub>4</sub>Si, rotamers) 21.4 (CH<sub>3</sub>-Ts), 24.7 (C-6''), 25.1 (C-2''), 25.8 (C-5''), 26.6 (C-2'), 28.3 (CH<sub>3</sub>)<sub>3</sub>C, 29.7 (C-1'), 31.0 (C-5), 33.4 (C-7''), 35.1, 35.2 (C-4a, C-8a), 36.1 (C-8), 46.9, 55.0 (C-6), 48.1 (C-10), 49.8, 50.9 (C-1, C-3), 51.5 (OCH<sub>3</sub>), 64.9 (CH<sub>2</sub>O), 79.7 [(CH<sub>3</sub>)<sub>3</sub>C], 104.3 (C-3'), 127.7, 128.2, 128.5, 129.1 (C-3'', C-4'', CH-Ts), 135.7 (C-Ts), 155.15 (NCOO), 174.0 (COO); HRMS (ESI) calcd for [C<sub>36</sub>H<sub>52</sub>N<sub>2</sub>O<sub>8</sub>S + NH<sub>4</sub>]<sup>+</sup>: 690.3783, found: 690.3777.

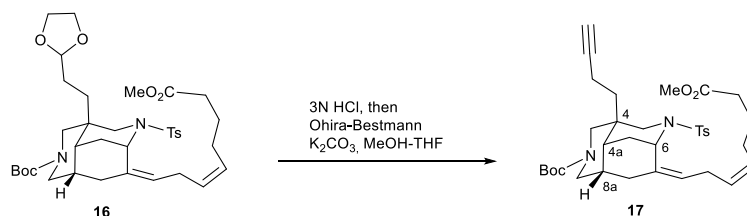

**(4*R*,4*aR*,6*S*,8*aS*) Alkyne derivative (17):** *First step:* A 3 N aqueous solution of HCl (2.4 mL, 7.2 mmol) was added to a solution of the tricyclic compound **16** (89 mg, 0.13 mmol) in THF (2.4 mL) and the mixture was stirred for 2 hours at room temperature. Saturated aqueous K<sub>2</sub>CO<sub>3</sub> was added until pH 8 and the mixture was extracted with CH<sub>2</sub>Cl<sub>2</sub>. The combined organic extracts were washed with brine, dried over anhydrous MgSO<sub>4</sub>, filtered, and concentrated to give the intermediate aldehyde, which was used in the next step without purification. *Second step:* K<sub>2</sub>CO<sub>3</sub> (50 mg, 0.23 mmol) and Bestmann reagent (20 μL, 0.14 mmol) were added under an inert atmosphere at room temperature to a solution of the aldehyde in anhydrous THF/MeOH (4 mL, 1:1), and the resulting mixture was stirred at room temperature overnight. The mixture was filtered through a Celite® pad, and the organic solvent was removed under reduced pressure. The residue was dissolved in CH<sub>2</sub>Cl<sub>2</sub>, and the resulting solution was washed with 5% aqueous NaHCO<sub>3</sub> and brine. The organic layer was dried over anhydrous MgSO<sub>4</sub>, filtered, and concentrated under reduced pressure to give alkyne **17**, which was used in the next step without purification. A sample was purified by flash column chromatography (hexane to 7:3 hexane-EtOAc) to give pure alkyne **17**: [α]<sub>D</sub><sup>22</sup> = + 79.6 (c 0.43 in CHCl<sub>3</sub>); IR (film): ν = 1732, 1682 (CO) cm<sup>-1</sup>; δ<sub>H</sub> (400 MHz; CDCl<sub>3</sub>; Me<sub>4</sub>Si, COSY, HSQC, selected resonances, rotamers) 1.32-1.48 [11 H, m, H-5, H-4a, (CH<sub>3</sub>)<sub>3</sub>C], 1.62-1.75 (3 H, m, H-6'', H-8a), 1.78-1.89 (2 H, m, H-8), 2.00 (1 H, s, H-4'), 2.05-2.18 (4 H, m, H-5'', H-2'), 2.22-2.27 (1 H, m, H-5), 2.30-2.34 (2 H, m, H-7''), 2.36 (3 H, s, CH<sub>3</sub>-Ts), 2.80-3.07 (3 H, m, H-2'', H-1, H-10), 3.29-3.43 (1 H, m, H-10), 3.67 (3 H, s, OCH<sub>3</sub>), 4.46, 4.95 (1 H, s, H-6), 5.09 (1 H, t, *J* = 7.2 Hz, H-1''), 5.18-5.40 (2 H, m, H-3'', H-4''), 7.16-7.24 (2 H, d, *J* = 7.6 Hz, H-Ts), 7.57-7.62 (2 H, d, *J* = 7.6 Hz, H-Ts); δ<sub>C</sub> (100.6 MHz; CDCl<sub>3</sub>; Me<sub>4</sub>Si, selected resonances, rotamers) 12.9 (C-2'), 21.4 (CH<sub>3</sub>-Ts), 24.7 (C-6''), 25.8 (C-2''), 26.6 (C-5''), 28.3 [(CH<sub>3</sub>)<sub>3</sub>C], 31.2 (C-5), 33.5 (C-7''), 34.0 (C-8a), 35.5 (C-8), 46.9, 55.0 (C-6), 51.4 (OCH<sub>3</sub>), 69.5 (C-4'), 79.7 [(CH<sub>3</sub>)<sub>3</sub>C], 128.2, 128.4, 129.2 (C-3'', C-4'', CH-Ts, CH-Ts), 155.1 (NCOO). HRMS (ESI) calcd for [C<sub>35</sub>H<sub>48</sub>N<sub>2</sub>O<sub>6</sub>S + NH<sub>4</sub>]<sup>+</sup>: 642.3571, found: 642.3568.

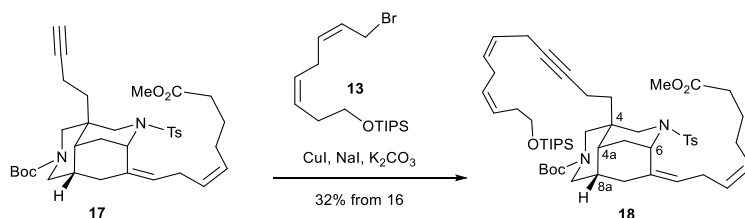

**(4*R*,4*aR*,6*S*,8*aS*) Dienyne intermediate (**18**):** The above alkyne **17** and bromo derivative **13** (94 mg, 0.26 mmol) were added at room temperature under an inert atmosphere to a suspension of CuI (49 mg, 0.26 mmol), NaI (39 mg, 0.26 mmol), and K<sub>2</sub>CO<sub>3</sub> (27 mg, 0.20 mmol) in anhydrous DMF (0.3 mL). The mixture was stirred overnight at room temperature. Saturated aqueous NH<sub>4</sub>Cl and EtOAc were added, and the resulting mixture was filtered through a Celite® pad. The layers were separated, and the aqueous phase was extracted with EtOAc. The combined organic extracts were washed with brine, dried over anhydrous Na<sub>2</sub>SO<sub>4</sub>, filtered, and concentrated under reduced pressure. Flash chromatography (hexane to 8:2 hexane-EtOAc) of the residue gave compound **18** (38 mg, 32% from **16**) as an oil:  $[\alpha]_D^{22} = +56.9$  (*c* 0.35 in CHCl<sub>3</sub>); IR (film):  $\nu = 1739, 1694$  (CO) cm<sup>-1</sup>;  $\delta_H$  (400 MHz; CDCl<sub>3</sub>; Me<sub>4</sub>Si, COSY, HSQC, selected resonances, rotamers) 1.06 [21 H, m, (CH<sub>3</sub>)<sub>2</sub>CH], 1.31-1.40 [10 H, m, H-5, (CH<sub>3</sub>)<sub>3</sub>C], 1.65-1.74 (4 H, m, H-6'', H-8a, H-4a), 2.03-2.17 (2 H, m, H-5''), 2.23-2.34 (5 H, m, H-11', H-7'', H-5), 2.36 (3 H, s, CH<sub>3</sub>-Ts), 2.77-2.82 (2 H, m, H-8'), 2.84-2.93 (4 H, m, H-2'', 2H-5', H-10), 2.99-3.08 (1 H, m, H-2''), 3.25-3.37 (1 H, m, H-10), 3.66-3.70 (5 H, m, H-12', OCH<sub>3</sub>), 4.45, 4.94 (1 H, s, H-6), 5.04-5.10, 5.19-5.54, 5.59-5.67, 5.70-5.79 (7 H, 4 m, H-1'', H-3'', H-4'', H-6', H-7', H-9', H-10'), 7.15-7.20 (2 H, m, H-Ts), 7.56-7.60 (2 H, m, H-Ts);  $\delta_C$  (100.6 MHz; CDCl<sub>3</sub>; Me<sub>4</sub>Si, selected resonances, rotamers) 12.0 [(CH<sub>3</sub>)<sub>2</sub>CH], 13.3 (C-2'), 18.0 [(CH<sub>3</sub>)<sub>2</sub>CH], 21.4 (CH<sub>3</sub>-Ts), 22.0 (C-5'), 24.7, 24.8 (C-6''), 25.8 (C-2''), 26.6 (C-5''), 28.3 [(CH<sub>3</sub>)<sub>3</sub>C], 30.2 (C-8'), 31.2 (C-5), 33.5 (C-7''), 35.0, 35.5, 35.7 (C-4a, C-8a, C-8), 46.9, 55.0 (C-6), 48.1-50.3 (C-1, C-3, C-10), 51.5 (OCH<sub>3</sub>), 63.1 (C-12''), 79.7 [(CH<sub>3</sub>)<sub>3</sub>C], 125.0, 127.8, 128.8, 129.1, 129.2, 129.9 (C-3'', C-4'', C-6', C-7', C-9', C-10', C-Ts), 155.1 (NCOO), 174.1 (COO); HRMS (ESI) calcd for [C<sub>52</sub>H<sub>80</sub>N<sub>2</sub>O<sub>7</sub>SSi + NH<sub>4</sub>]<sup>+</sup>: 922.5794, found: 922.5786.



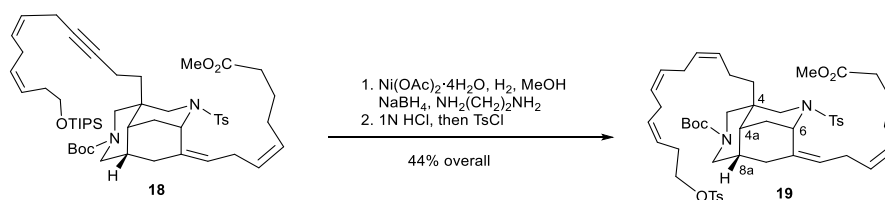

**(4*R*,4*aR*,6*S*,8*aS*) Tosylate derivative (19):** *First step:* Ethylenediamine (5  $\mu$ L, 0.07 mmol) was added at room temperature under an argon atmosphere to a solution of Ni(OAc)<sub>2</sub>·4H<sub>2</sub>O (15 mg, 0.06 mmol) and NaBH<sub>4</sub> (3 mg, 0.07 mmol) in anhydrous MeOH (1.2 mL). Then, dienyne **18** (31 mg, 0.03 mmol) in anhydrous MeOH (20 mL) was added and the argon atmosphere was replaced with hydrogen. The mixture was vigorously stirred for one hour, filtered through Celite®, and concentrated. The resulting residue was dissolved in CH<sub>2</sub>Cl<sub>2</sub>, and the solution was washed with brine, dried over anhydrous MgSO<sub>4</sub>, and concentrated to give the corresponding triene, which was used in the next step without purification. HRMS (ESI) calcd for [C<sub>52</sub>H<sub>82</sub>N<sub>2</sub>O<sub>7</sub>SSi + NH<sub>4</sub>]<sup>+</sup>: 924.5950, found: 924.5938. *Second step:* A 2 N aqueous solution of HCl (0.4 mL, 0.8 mmol) was added to a solution of the above triene in MeOH (3 mL), and the mixture was stirred for 20 minutes at room temperature. Saturated aqueous NaHCO<sub>3</sub> was added until pH 7, and the methanol was evaporated. The aqueous phase was extracted with CH<sub>2</sub>Cl<sub>2</sub>, and the organic extracts were dried over anhydrous MgSO<sub>4</sub>, filtered, and concentrated under reduced pressure to give the crude alcohol. *Third step:* *p*-Toluenesulfonyl chloride (11 mg, 0.06 mmol) was added at room temperature under an inert atmosphere to a solution of the above alcohol, Et<sub>3</sub>N (17  $\mu$ L, 0.12 mmol), and DMAP (0.7 mg, 6  $\mu$ mol) in anhydrous CH<sub>2</sub>Cl<sub>2</sub> (0.6 mL), and the mixture was stirred for 15 hours. Saturated aqueous NH<sub>4</sub>Cl was added, and the mixture was extracted with CH<sub>2</sub>Cl<sub>2</sub>. The organic extracts were washed with brine, dried over anhydrous MgSO<sub>4</sub>, and concentrated under reduced pressure. Flash chromatography (hexane to 7:3 hexane-EtOAc) of the residue afforded tosylate **19** (12 mg, 44%) as an oil:  $[\alpha]_D^{22} = +47.3$  (*c* 0.23 in CHCl<sub>3</sub>); IR (film):  $\nu = 1738, 1693$  (CO) cm<sup>-1</sup>;  $\delta_H$  (400 MHz; CDCl<sub>3</sub>; Me<sub>4</sub>Si, COSY, HSQC, selected resonances, rotamers) 1.31-1.45 [10 H, m, H-5, (CH<sub>3</sub>)<sub>3</sub>C], 1.57-1.63 (3 H, m, H-6'', H-4a), 2.03-2.17 (2 H, m, H-5''), 2.22-2.48 (5 H, m, H-11', H-7'', H-5), 2.36 (3 H, s, CH<sub>3</sub>-Ts), 2.45 (3 H, s, CH<sub>3</sub>-Ts), 2.67-2.96 (6 H, m, H-8', H-2'', H-5'), 3.02 (1 H, m, H-10), 3.35 (1 H, m, H-10), 3.67 (3 H, s, OCH<sub>3</sub>), 4.01 (2 H, m, H-12'), 4.45, 4.94 (1 H, s, H-6), 5.08 (1 H, m, H-12), 5.25-5.53 (9 H, m, H-1'', H-3'', H-4'', H-3', H-4', H-6', H-7', H-9', H-10'), 7.16-7.20 (2 H, m, H-Ts), 7.34 (2 H, d, *J* = 8.0 Hz, H-Ts), 7.57-7.61 (2 H, m, H-Ts), 7.79 (2 H, d, *J* = 8.0 Hz, H-Ts);  $\delta_C$  (100.6 MHz; CDCl<sub>3</sub>; Me<sub>4</sub>Si, selected resonances, rotamers) 21.4, 21.6 (CH<sub>3</sub>-Ts), 22.7 (C-5'), 24.7, 24.8 (C-6''), 25.8 (C-2''), 26.6 (C-5''), 28.3 [(CH<sub>3</sub>)<sub>3</sub>C], 33.5 (C-7''), 35.5, 35.8 (C-4a, C-8a), 46.9, 55.1 (C-6), 47.5-50.0 (C-1, C-3, C-10), 51.5 (OCH<sub>3</sub>), 69.7 (C-12''), 79.6 [(CH<sub>3</sub>)<sub>3</sub>C], 127.9, 128.3, 128.5, 129.2, 129.6, 129.8 (C-3'', C-4'', C-3', C-4', C-6', C-7', C-9', C-10', C-Ts), 155.2 (NCOO), 174.1 (COO); HRMS (ESI) calcd for [C<sub>50</sub>H<sub>68</sub>N<sub>2</sub>O<sub>9</sub>S<sub>2</sub> + H]<sup>+</sup>: 905.3720, found: 905.3710.

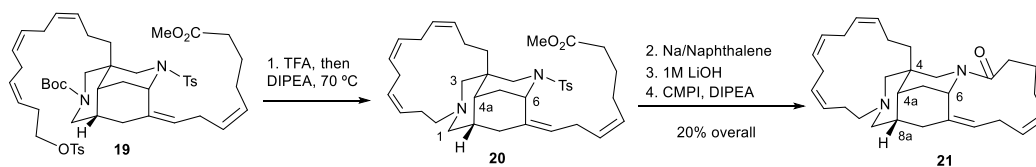

**(4*R*,4*aR*,6*S*,8*aS*) Pentacyclic lactam (**21**):** *First step:* TFA (0.12 mL, 1.4 mmol) was added under an inert atmosphere to a solution of tosylate **19** (20 mg, 0.022 mmol) in anhydrous CH<sub>2</sub>Cl<sub>2</sub> (0.4 mL), and the mixture was stirred at room temperature for 30 minutes. The solvent was removed, and the resulting residue was dissolved in toluene and evaporated (two times) to give the crude secondary amine, which was taken in anhydrous MeCN (20 mL). *N,N*-Diisopropylethylamine (0.02 mL, 0.12 mmol) was added at room temperature under an inert atmosphere to the above solution and the mixture was stirred overnight at 70 °C. The solvent was evaporated under reduced pressure. Flash chromatography (hexane to 1:1 hexane-EtOAc) of the residue afforded crude tetracycle **20** (6 mg), which was purified by semipreparative HPLC:  $\delta_{\text{H}}$  (500 MHz, 1.7 mm microcryoprobe, toluene-*d*<sub>8</sub>, HSQC, selected resonances) 1.75 (1 H, m, H-4*a*), 2.08-2.20 (4 H, m, CH<sub>2</sub>CO, CH<sub>2</sub>N), 2.36 (3 H, s, CH<sub>3</sub>-Ts), 3.44 (3 H, s, OCH<sub>3</sub>), 3.75 (2 H, m, H-1, H-3), 4.60 (1 H, s, H-6), 5.15-5.53 (9 H, m, =CH), 7.00-7.10 (2 H, m, H-Ts), 7.80-7.88 (2 H, m, H-Ts); HRMS (ESI) calcd for [C<sub>38</sub>H<sub>52</sub>N<sub>2</sub>O<sub>4</sub>S + H]<sup>+</sup>: 633.3721, found: 633.3720. *Second step:* Sodium metal (11 mg, 0.43 mmol) was added at room temperature to a solution of naphthalene (29 mg, 0.22 mmol) in anhydrous THF (1 mL). After stirring for 2 h, part of the mixture (0.4 mL) was added at -78 °C to a solution of sulfonamide **20** (5 mg, 0.007 mmol) in anhydrous THF (0.8 mL), and the resulting mixture was stirred for 10 min. A few drops of saturated aqueous NH<sub>4</sub>Cl were carefully added, and the resulting solution was dried over anhydrous MgSO<sub>4</sub>, filtered, and concentrated under reduced pressure to give a sensitive crude amino ester. *Third step:* A solution of LiOH (0.6 mL of a 1 M solution in water, 0.6 mmol) was added to a stirred solution of the above amino ester in THF (0.5 mL), and the mixture was stirred at room temperature for 3.5 h. The solution was concentrated under reduced pressure to give the crude amino acid. *Fourth step:* *N,N*-Diisopropylethylamine (6  $\mu$ L, 0.035 mmol) and 2-chloro-1-methylpyridinium iodide (9 mg, 0.035 mmol) were added at room temperature under an inert atmosphere to a solution of the above amino acid in anhydrous CH<sub>2</sub>Cl<sub>2</sub> (7 mL), and the mixture was stirred overnight at room temperature. Saturated aqueous NH<sub>4</sub>Cl was added and the resulting mixture was extracted with CH<sub>2</sub>Cl<sub>2</sub>. The combined organic extracts were washed with brine, dried over anhydrous MgSO<sub>4</sub>, filtered, and concentrated under reduced pressure. Flash chromatography (hexane to 1:1 hexane-EtOAc) of the residue afforded pentacyclic lactam **21**<sup>2</sup> (1.5 mg, 20% from **19**): HRMS (ESI) calcd for [C<sub>30</sub>H<sub>42</sub>N<sub>2</sub>O + H]<sup>+</sup>: 447.3370, found: 447.3376.

<sup>2</sup> T. Suto, Y. Yanagita, Y. Nagashima, S. Takikawa, Y. Kurosu, N. Matsuo, T. Sato and N. Chida, *J. Am. Chem. Soc.* 2017, **139**, 2952.

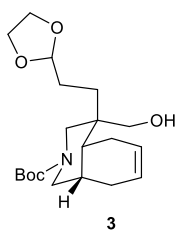

400 MHz; CDCl<sub>3</sub>; Me<sub>4</sub>Si

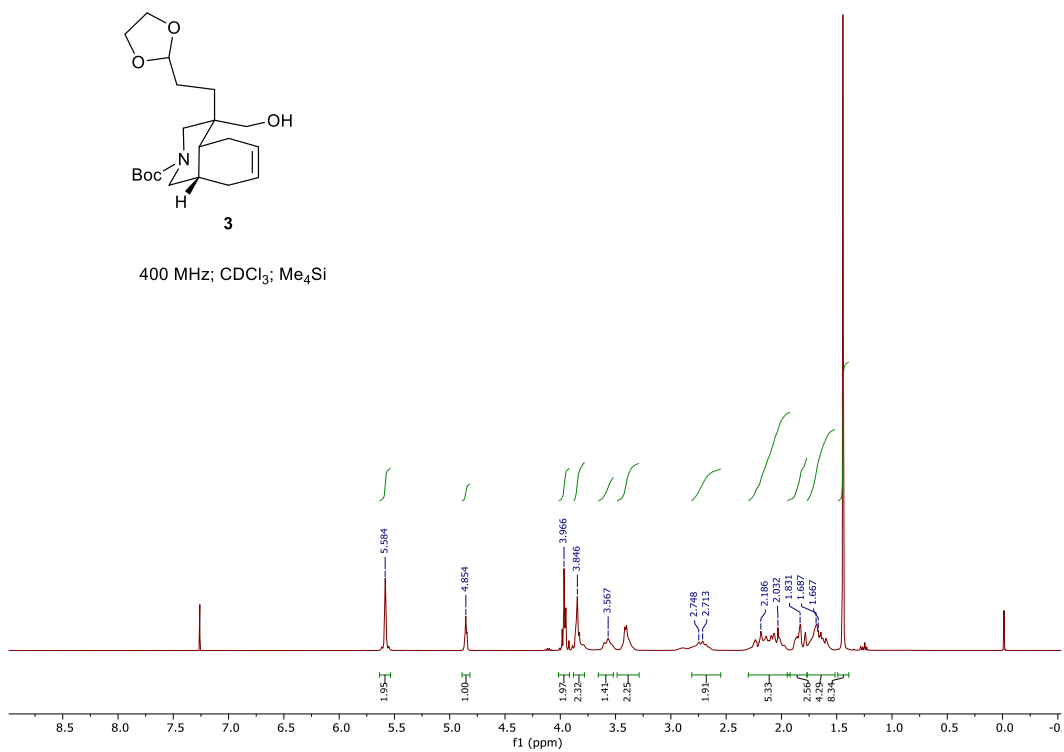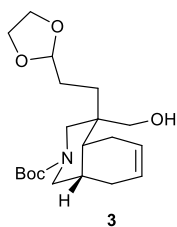

100.6 MHz; CDCl<sub>3</sub>; Me<sub>4</sub>Si

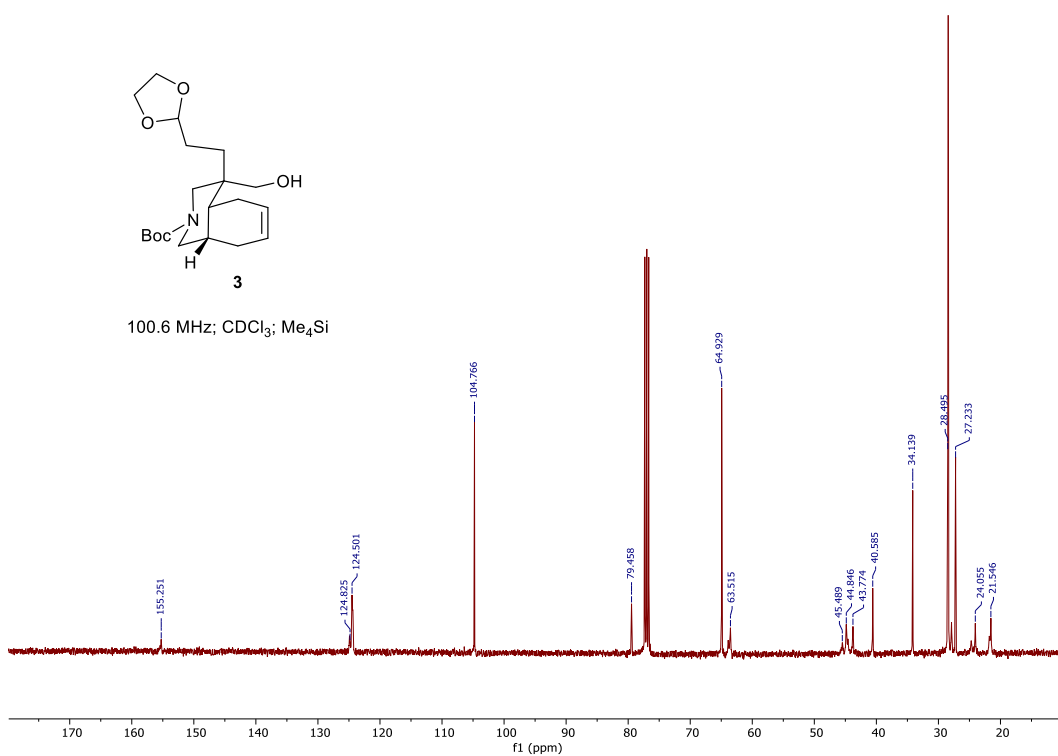



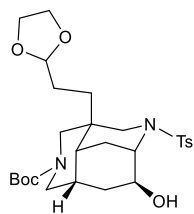

5

400 MHz; CDCl<sub>3</sub>; Me<sub>4</sub>S

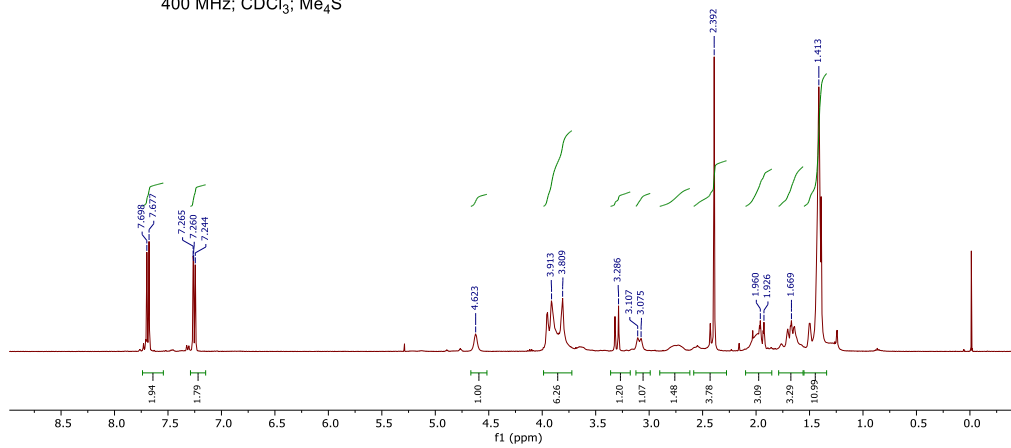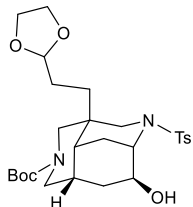

5

100.6 MHz; CDCl<sub>3</sub>; Me<sub>4</sub>Si

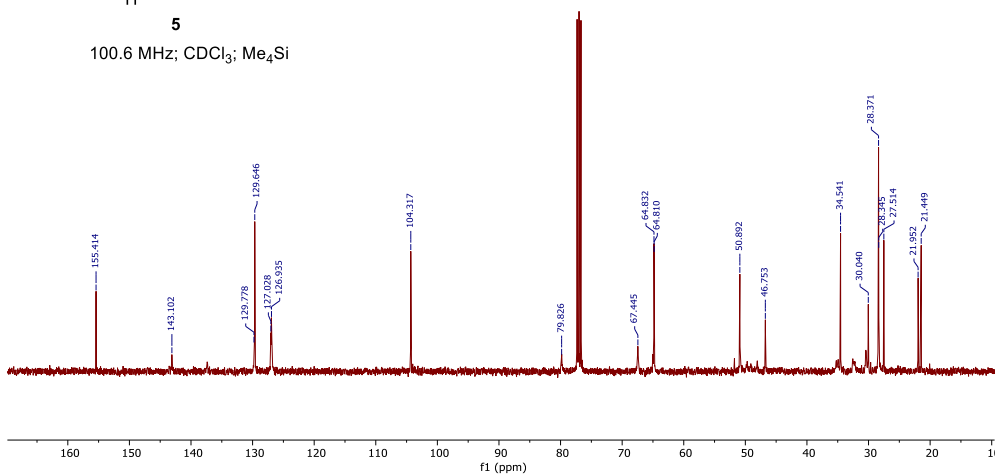

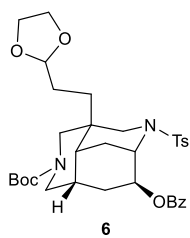

400 MHz; CDCl<sub>3</sub>; Me<sub>4</sub>S

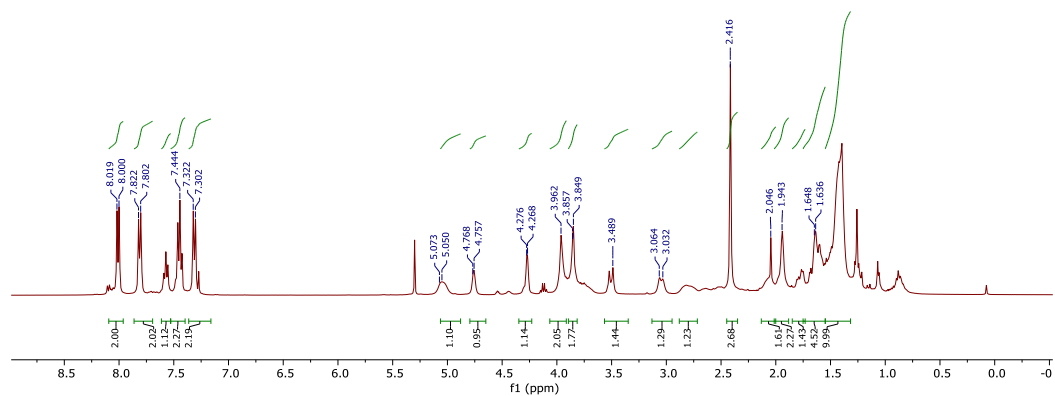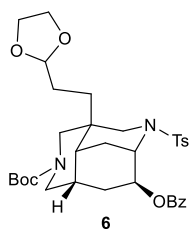

100.6 MHz; CDCl<sub>3</sub>; Me<sub>4</sub>Si

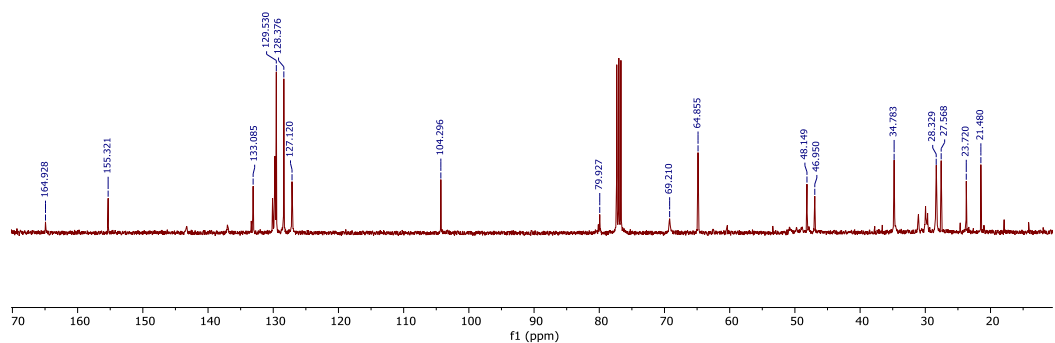

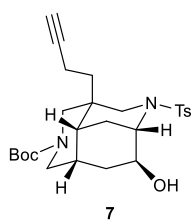

400 MHz; CDCl<sub>3</sub>; Me<sub>4</sub>S

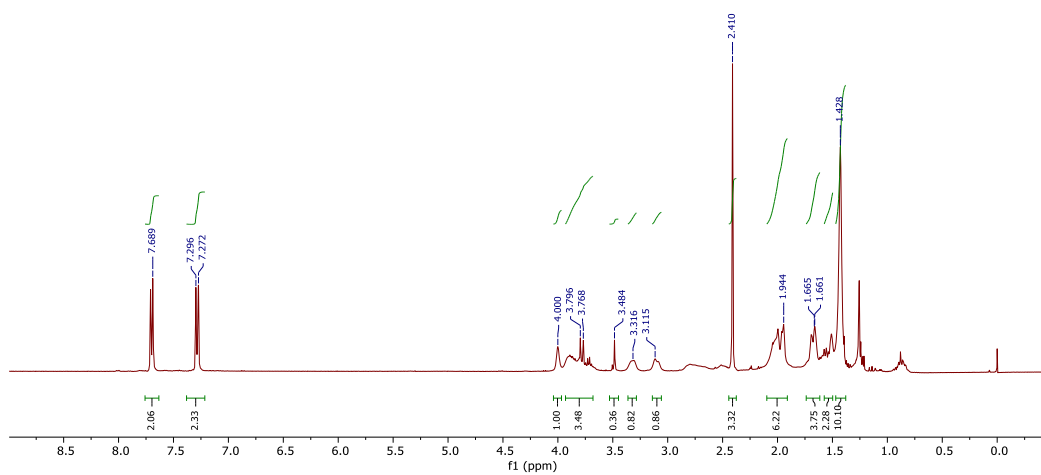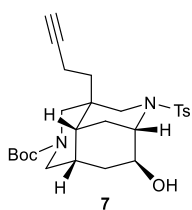

100.6 MHz; CDCl<sub>3</sub>; Me<sub>4</sub>Si

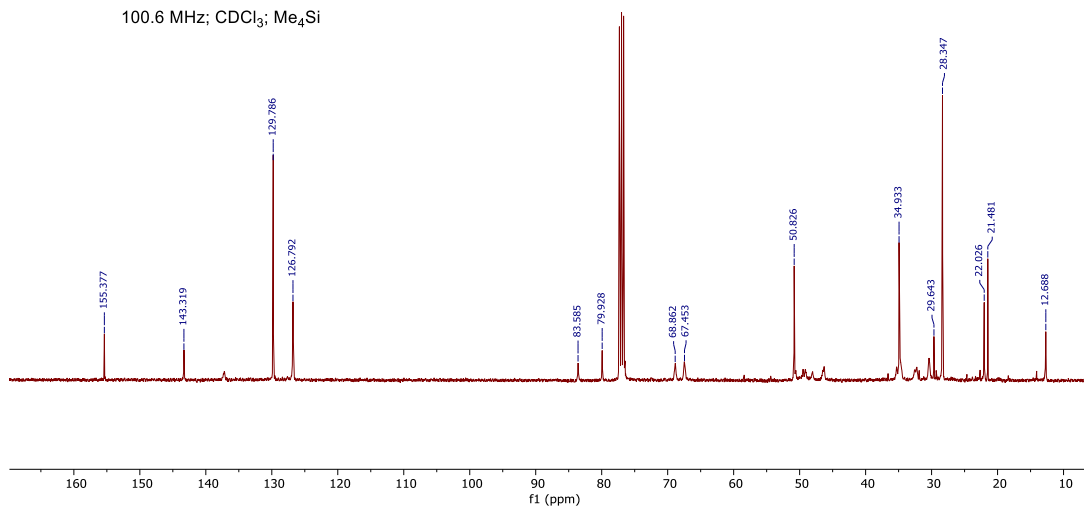

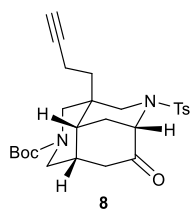

400 MHz; CDCl<sub>3</sub>; Me<sub>4</sub>S

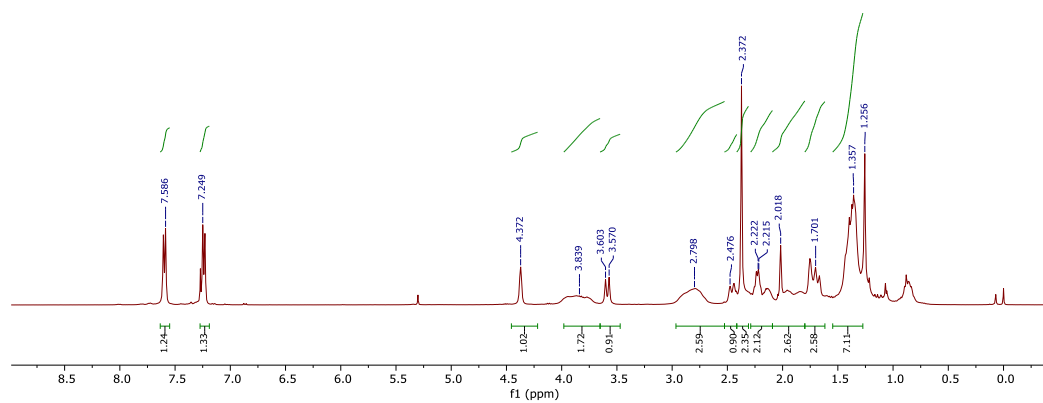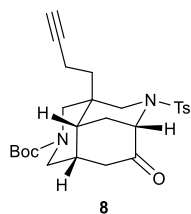

100.6 MHz; CDCl<sub>3</sub>; Me<sub>4</sub>Si

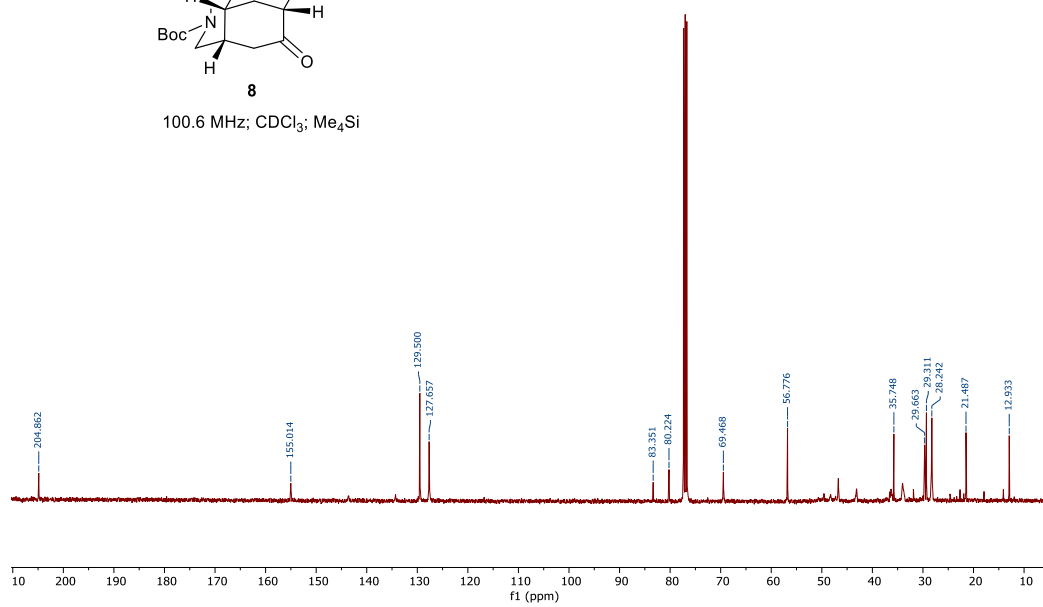



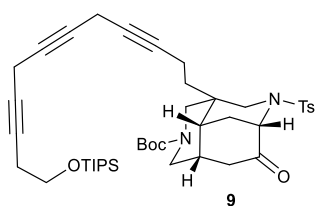

400 MHz; CDCl<sub>3</sub>; Me<sub>4</sub>S

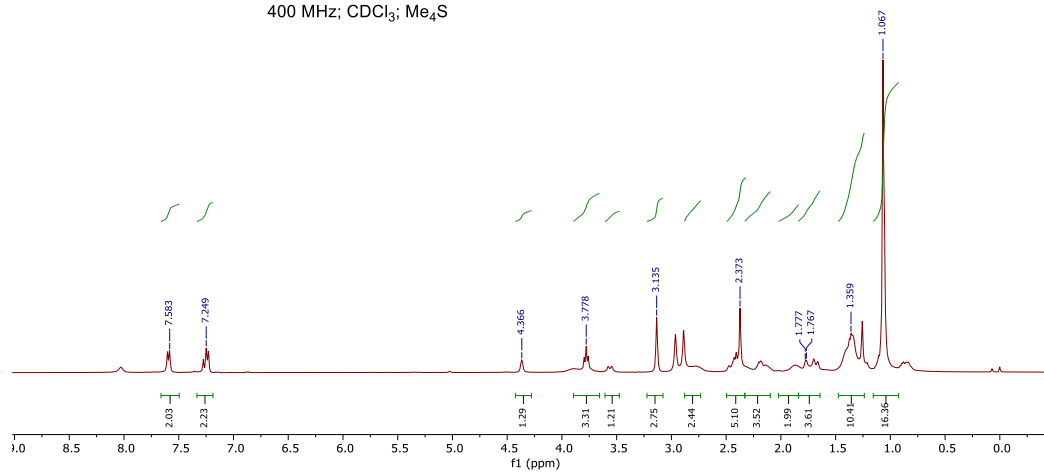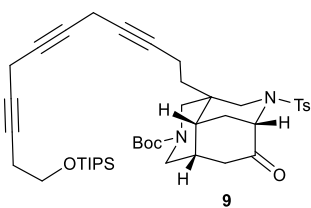

100.6 MHz; CDCl<sub>3</sub>; Me<sub>4</sub>Si

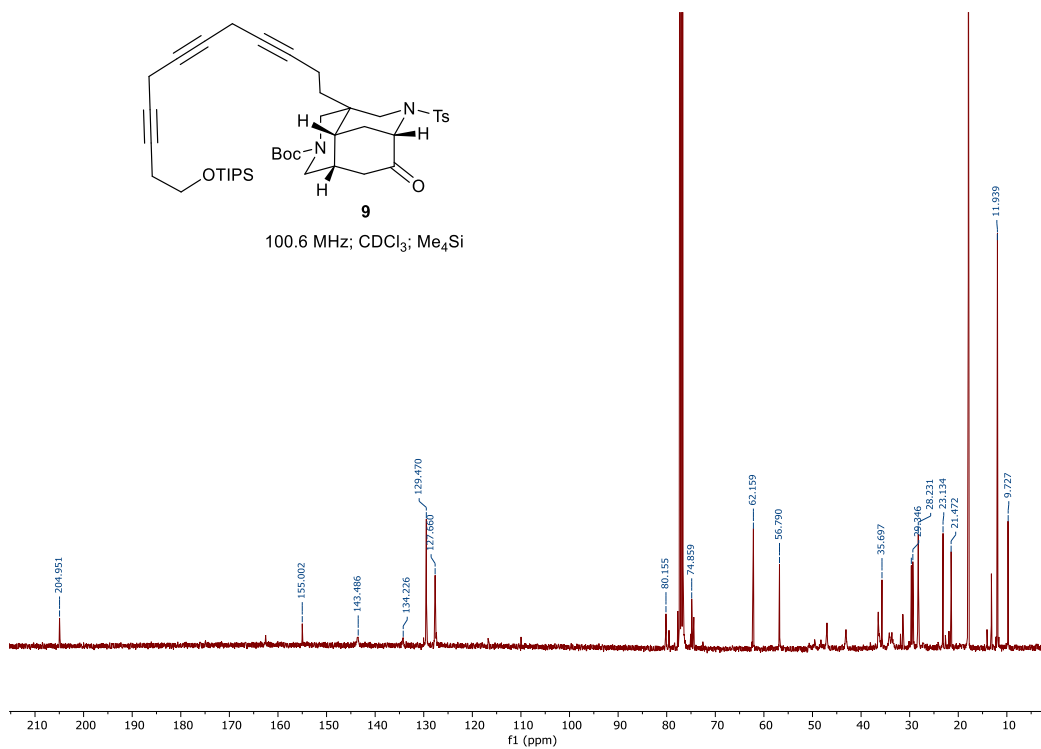

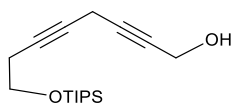

11

400 MHz; CDCl<sub>3</sub>; Me<sub>4</sub>S

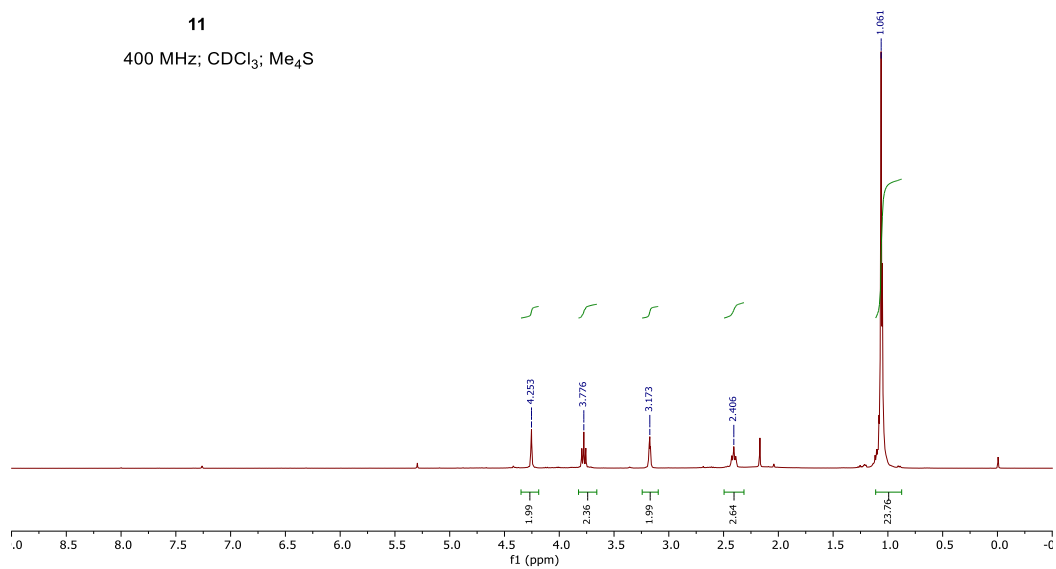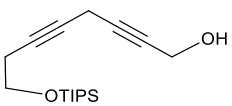

11

100.6 MHz; CDCl<sub>3</sub>; Me<sub>4</sub>Si

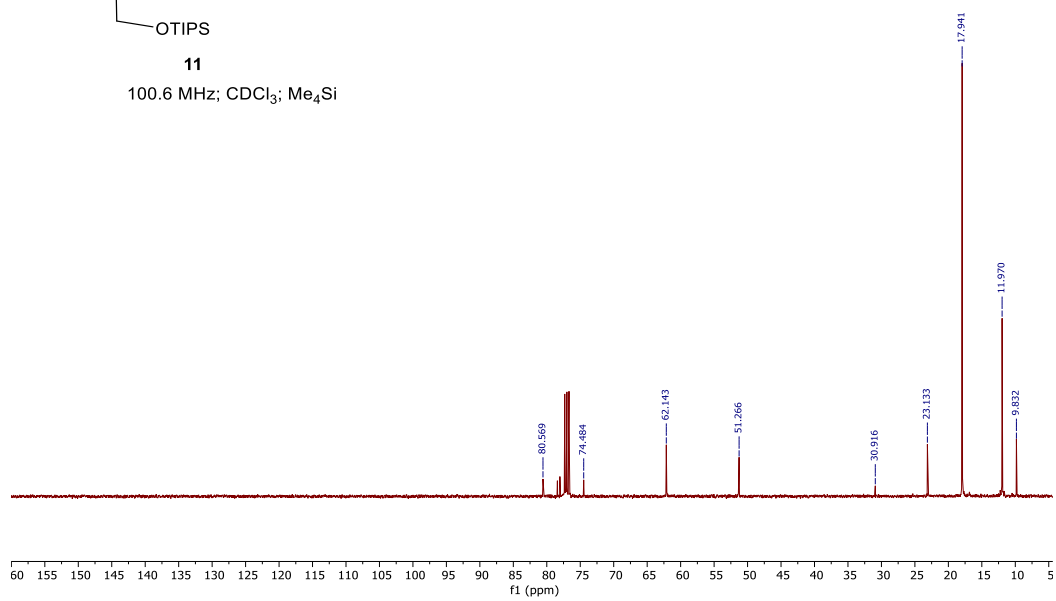

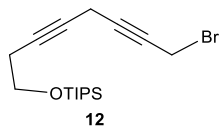

400 MHz; CDCl<sub>3</sub>; Me<sub>4</sub>S

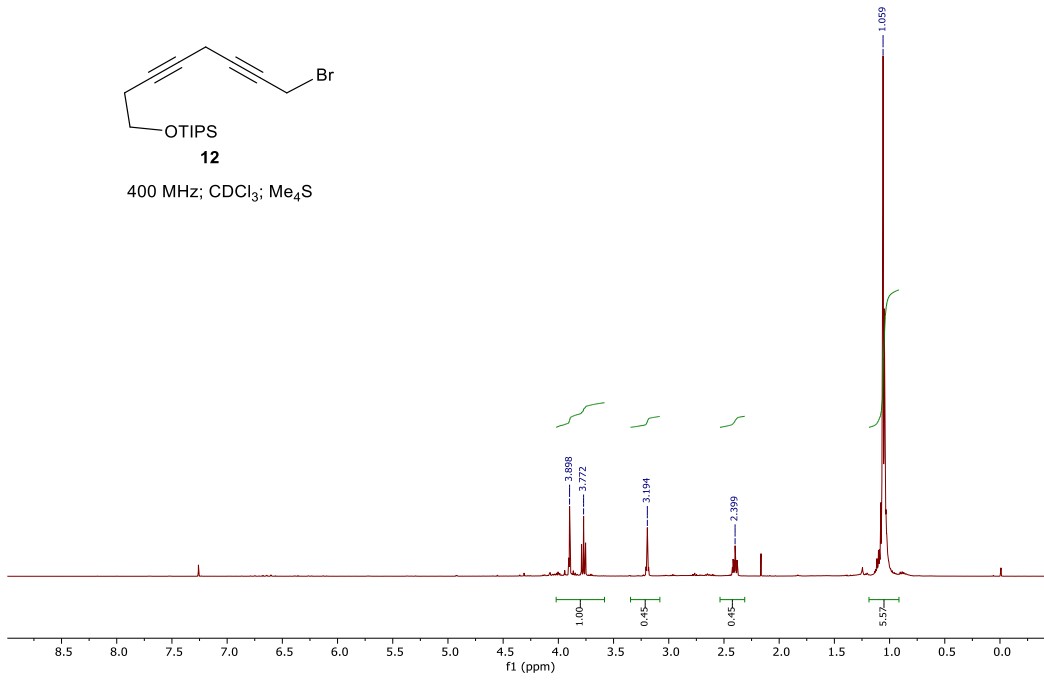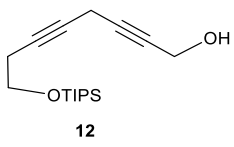

100.6 MHz; CDCl<sub>3</sub>; Me<sub>4</sub>Si

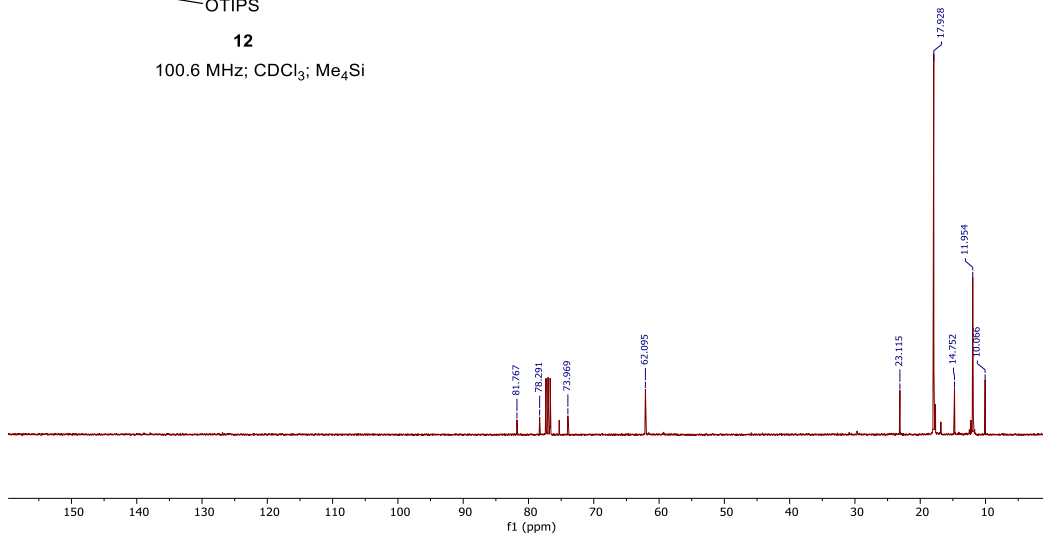

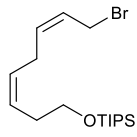

13

400 MHz; CDCl<sub>3</sub>; Me<sub>4</sub>S

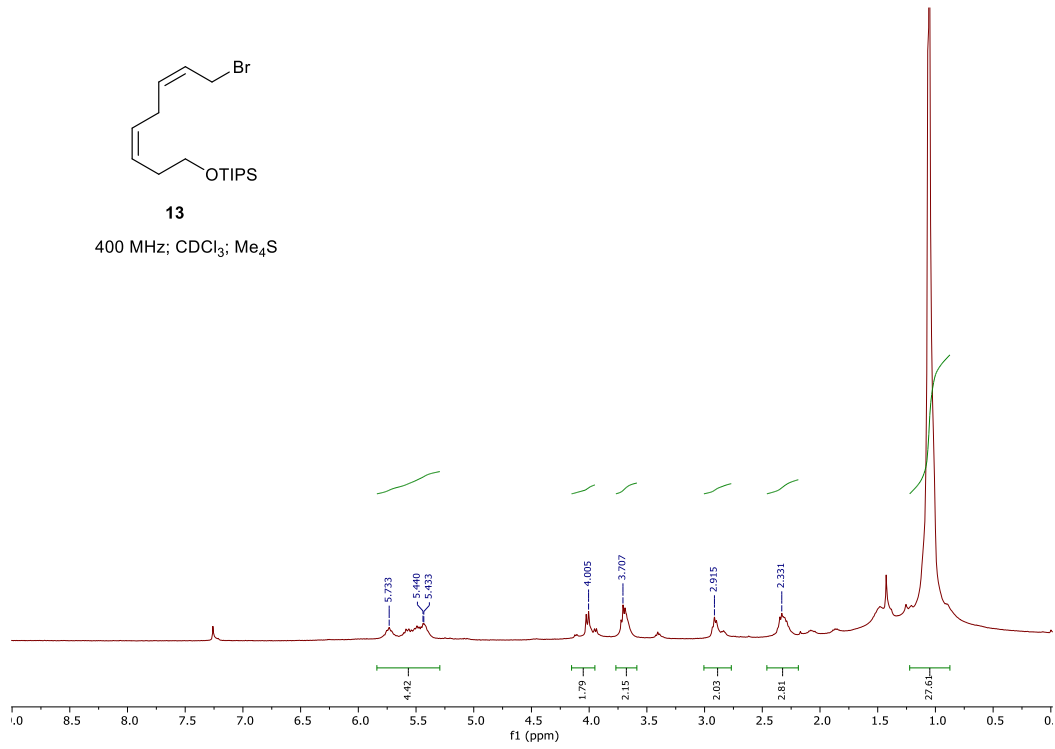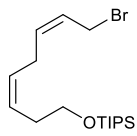

13

100.6 MHz; CDCl<sub>3</sub>; Me<sub>4</sub>Si

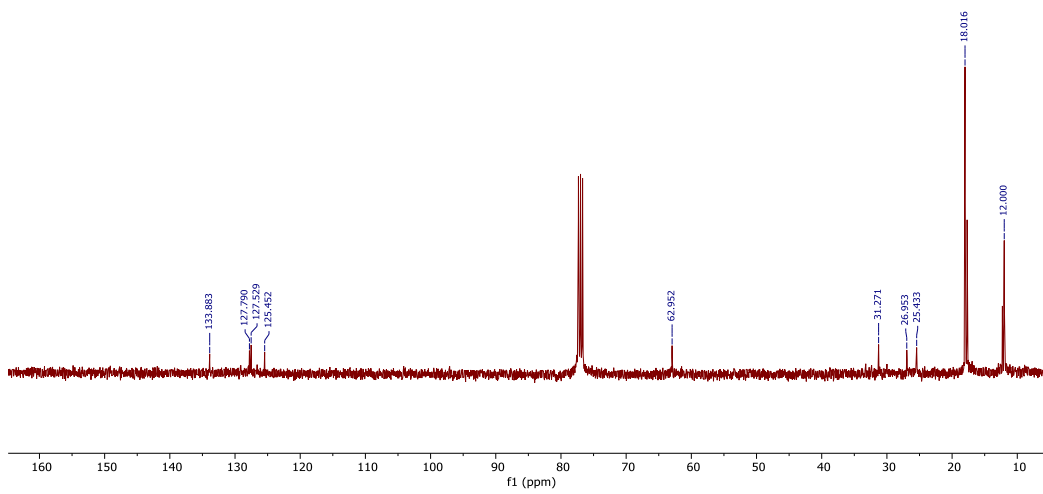

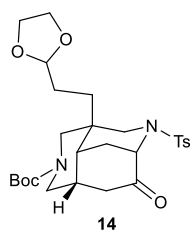

400 MHz; CDCl<sub>3</sub>; Me<sub>4</sub>S

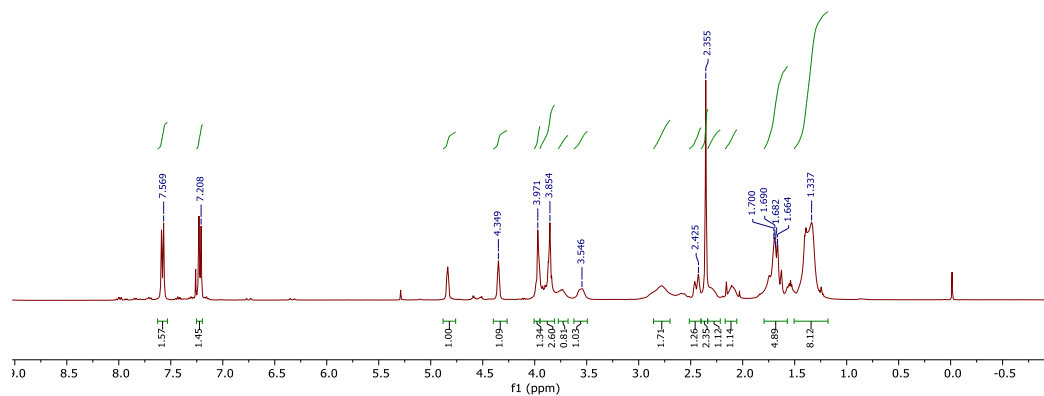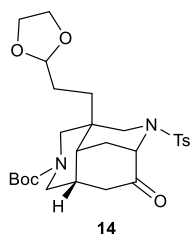

100.6 MHz; CDCl<sub>3</sub>; Me<sub>4</sub>Si

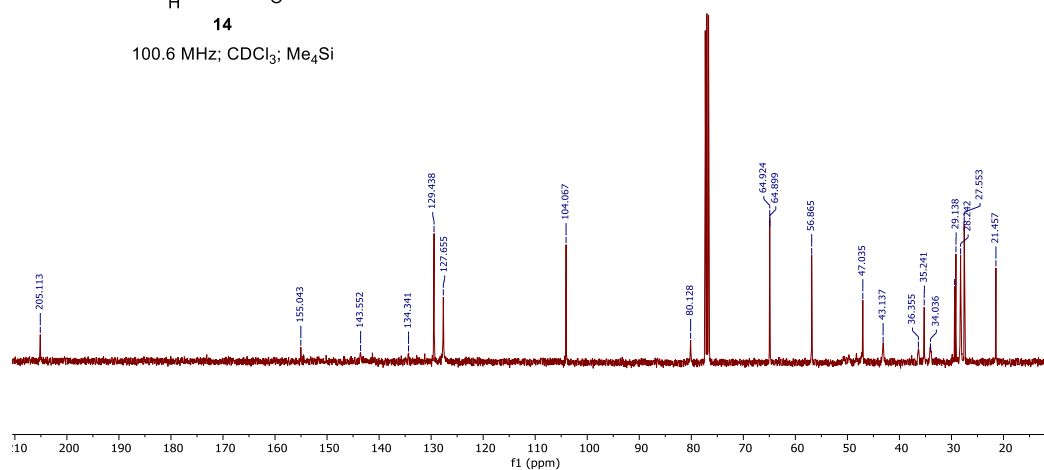

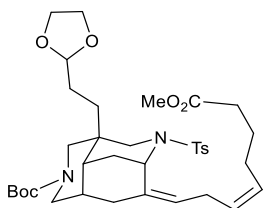

**16**

400 MHz; CDCl<sub>3</sub>; Me<sub>4</sub>S

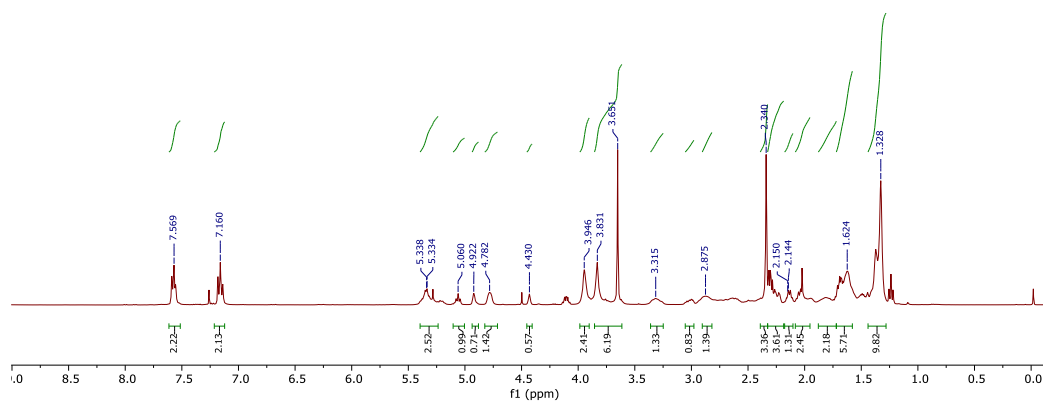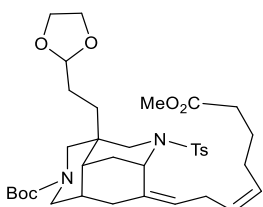

**16**

100.6 MHz; CDCl<sub>3</sub>; Me<sub>4</sub>Si

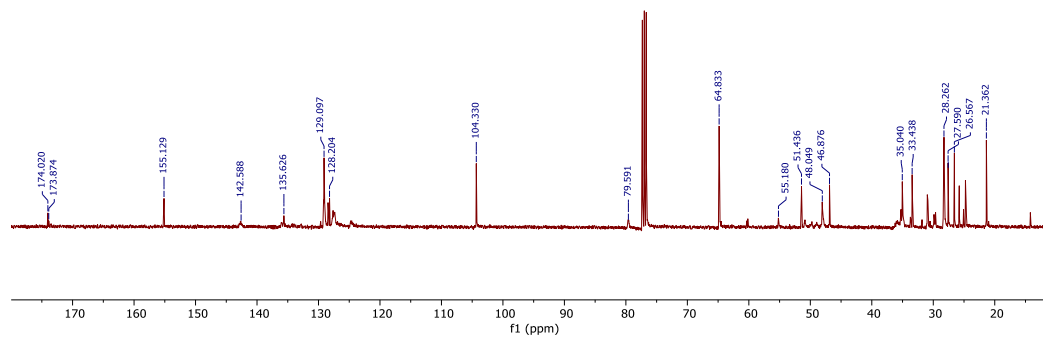

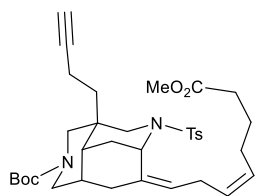

17

400 MHz; CDCl<sub>3</sub>; Me<sub>4</sub>S

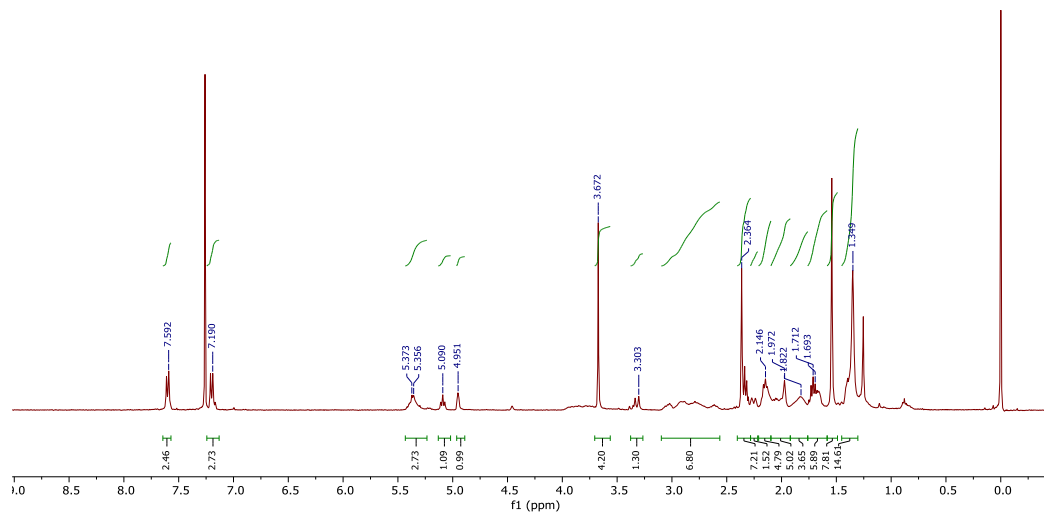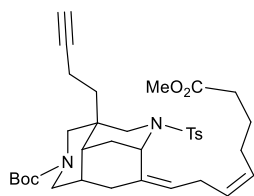

17

100.6 MHz; CDCl<sub>3</sub>; Me<sub>4</sub>Si

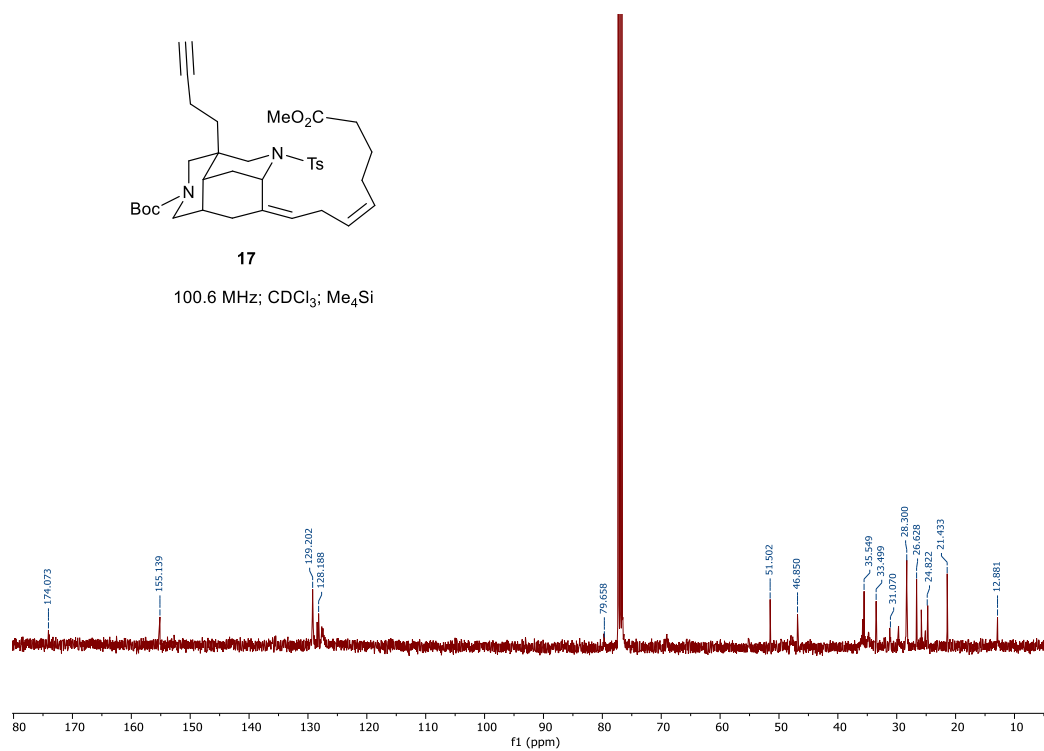

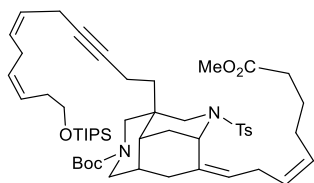

**18**

400 MHz; CDCl<sub>3</sub>; Me<sub>4</sub>S

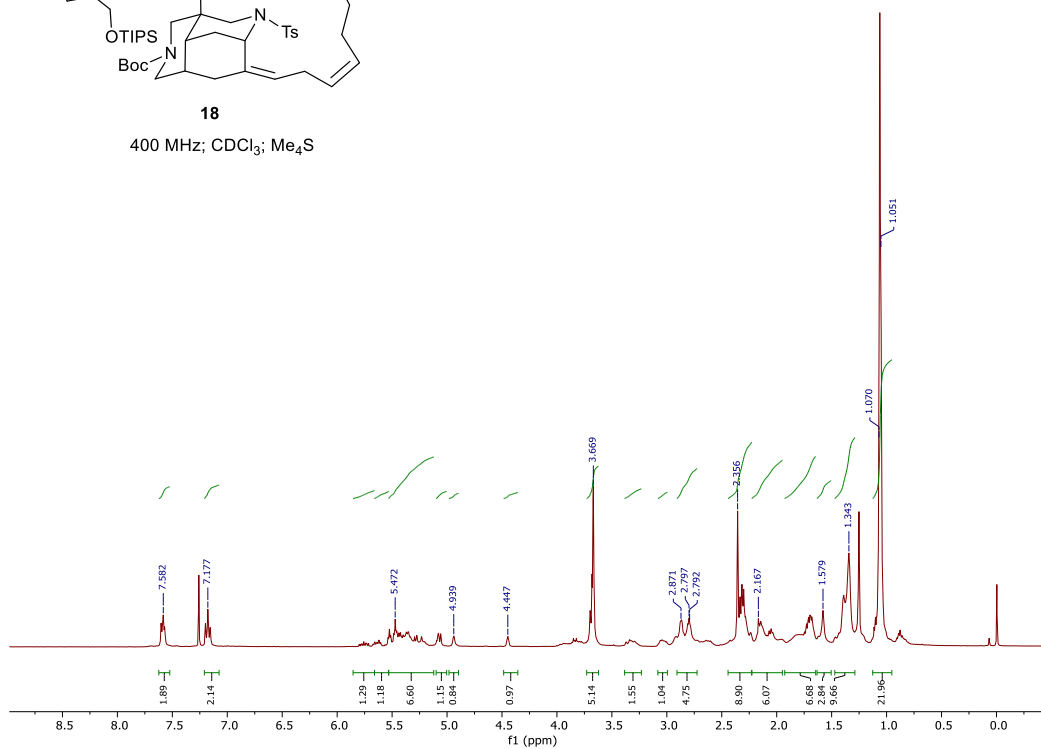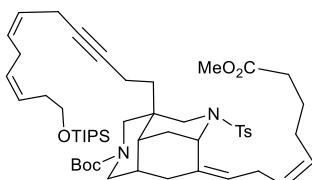

**18**

100.6 MHz; CDCl<sub>3</sub>; Me<sub>4</sub>Si

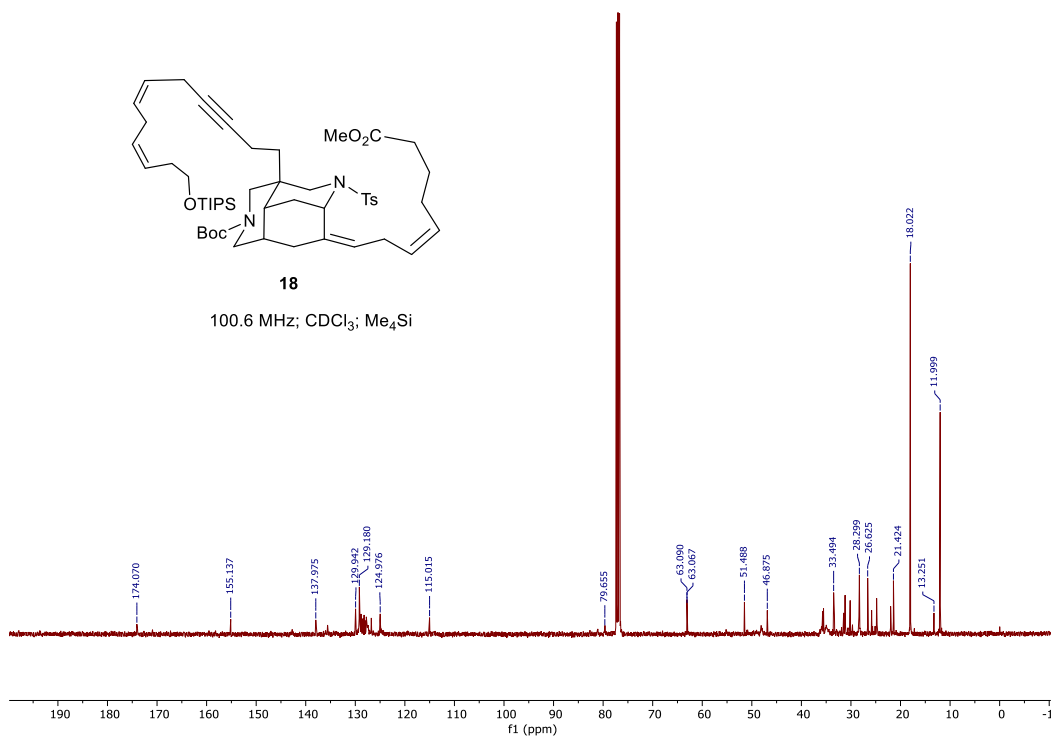



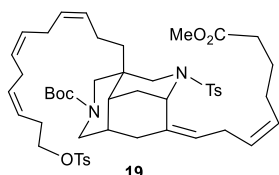

400 MHz; CDCl<sub>3</sub>; Me<sub>4</sub>S

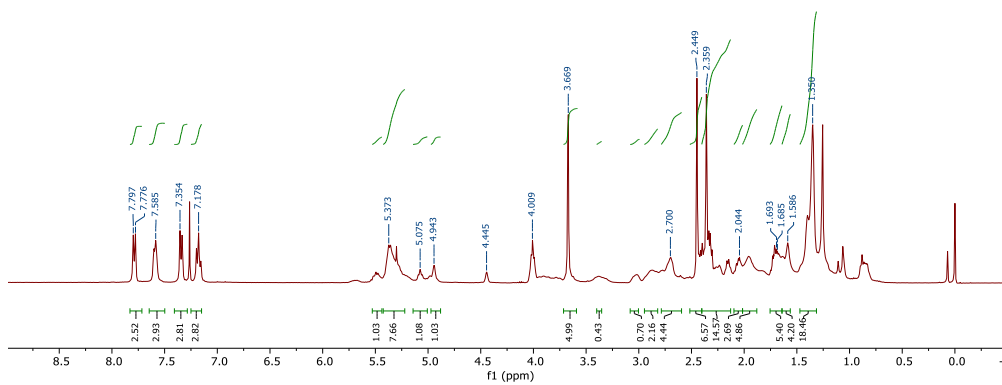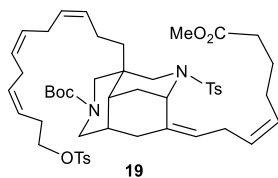

100.6 MHz; CDCl<sub>3</sub>; Me<sub>4</sub>Si

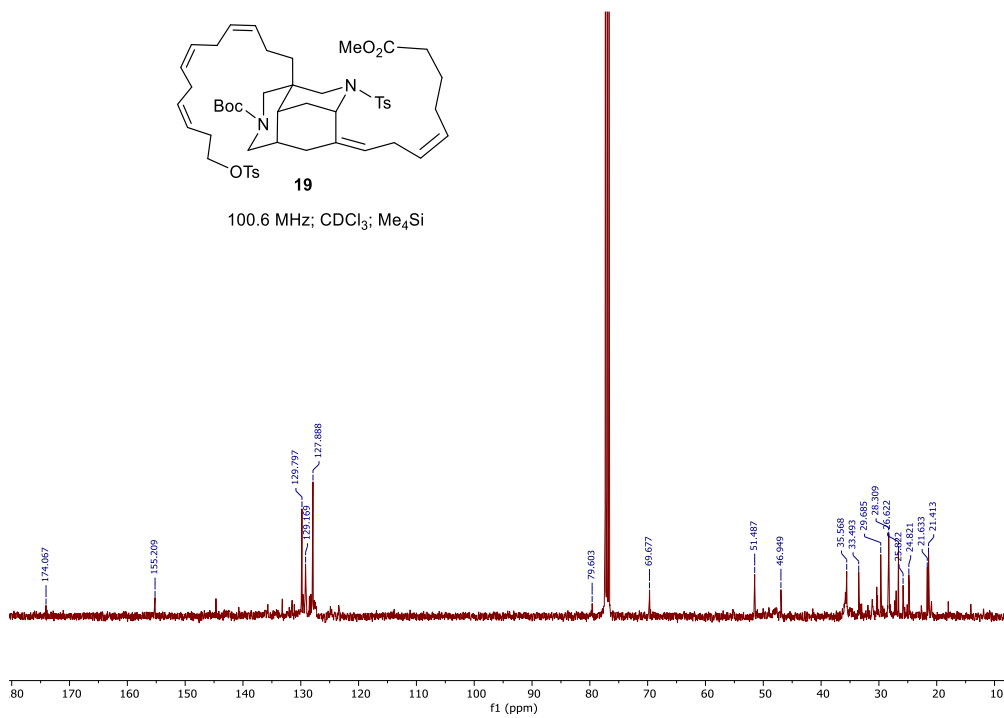

LCMS compound **20** (5-100 ACN/AQ TFA+NH<sub>4</sub>COOH 10min,  $m/z$  633)

A2 ↓

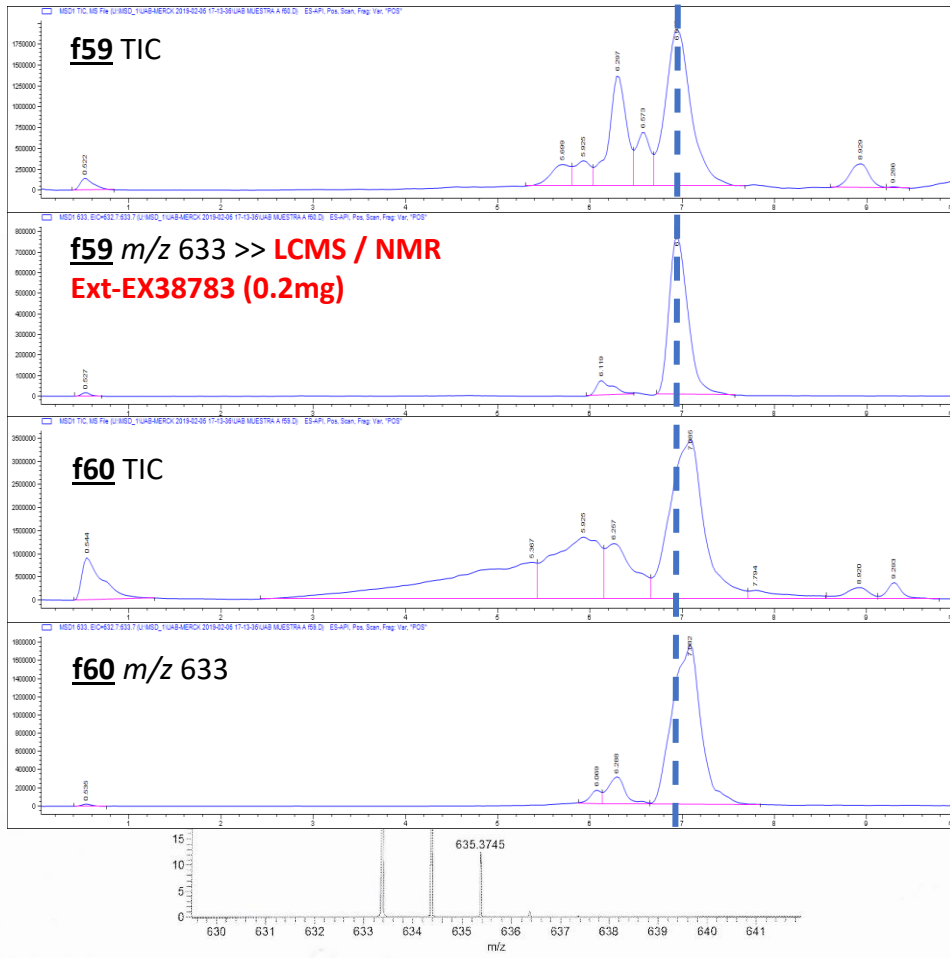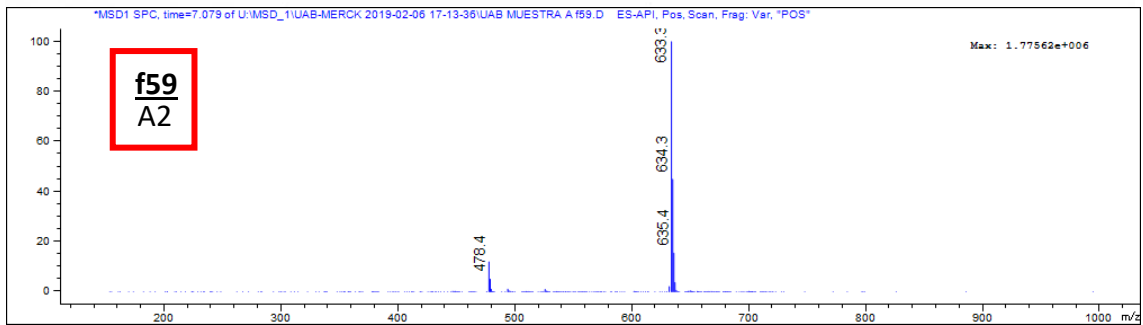

f59 m/z 633  
Ext-EX38783\_Toluene-d\_24C\_RT\_190219  
(H9 rack1, 172)

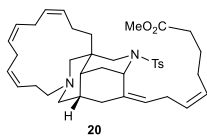

500 MHz; 1.7 mm microcryoprobe;  
toluene-d8

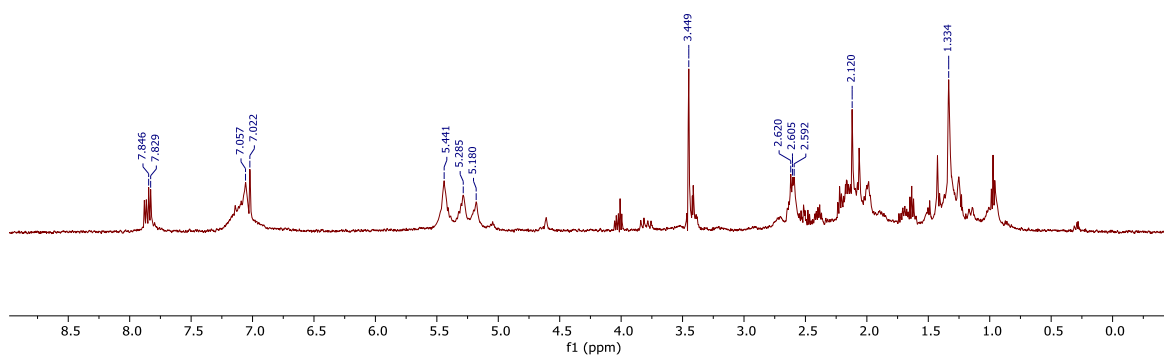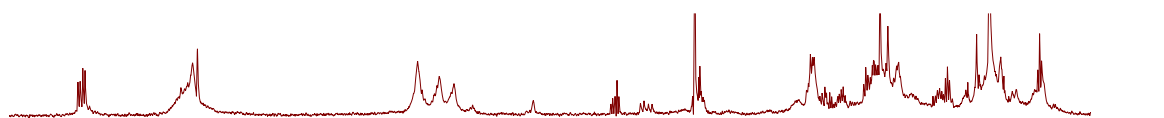

HSQC  
f59 m/z 633  
Ext-EX38783\_Toluene-d\_24C\_RT\_190219

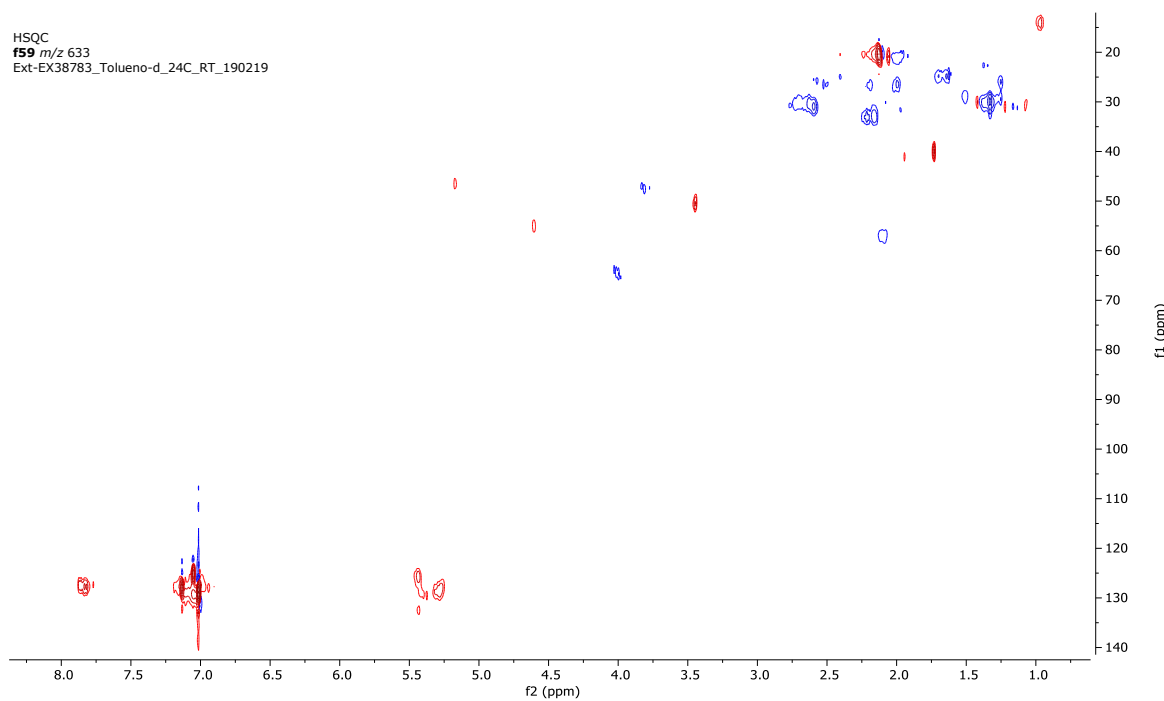

Muestra\_A\_con\_181128193538  
Registro: 2018111109

11/28/2018 7:35:38 PM

Analyst: AAA  
Instrument: LTQ-Orbitrap

Muestra\_A con 181128193538 #2515-2593 RT: 16.95-17.44 AV: 40 SB: 72 16.58-16.89, 17.56-18.14 NL: 1.40E8  
F: FTMS + p ESI Full ms [100.00-2000.00]

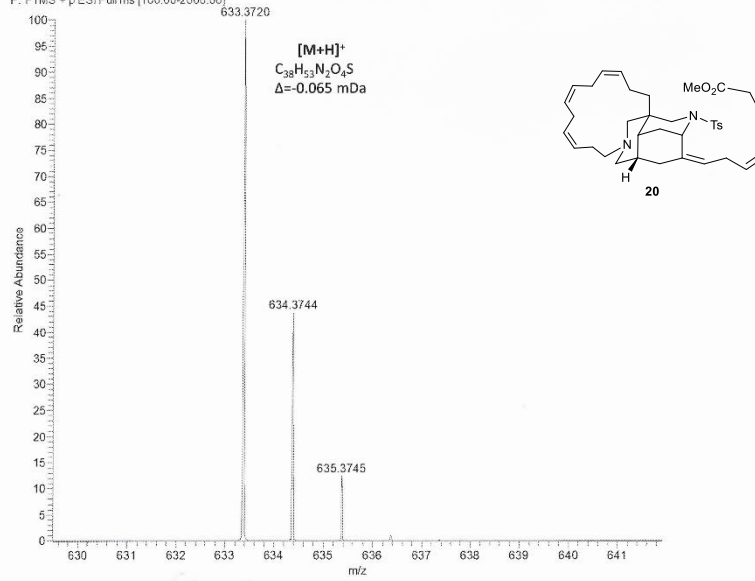

Muestra\_A\_con\_181128193538  
Registro: 2018111109

11/28/2018 7:35:38 PM

Analyst: AAA  
Instrument: LTQ-Orbitrap

NL:  
1.40E8  
Muestra\_A\_con\_181128193538#251  
5-2593 RT: 16.95-17.44 AV: 40  
SB: 72 16.58-16.89, 17.56-18.14  
F: FTMS + p ESI Full ms  
[100.00-2000.00]

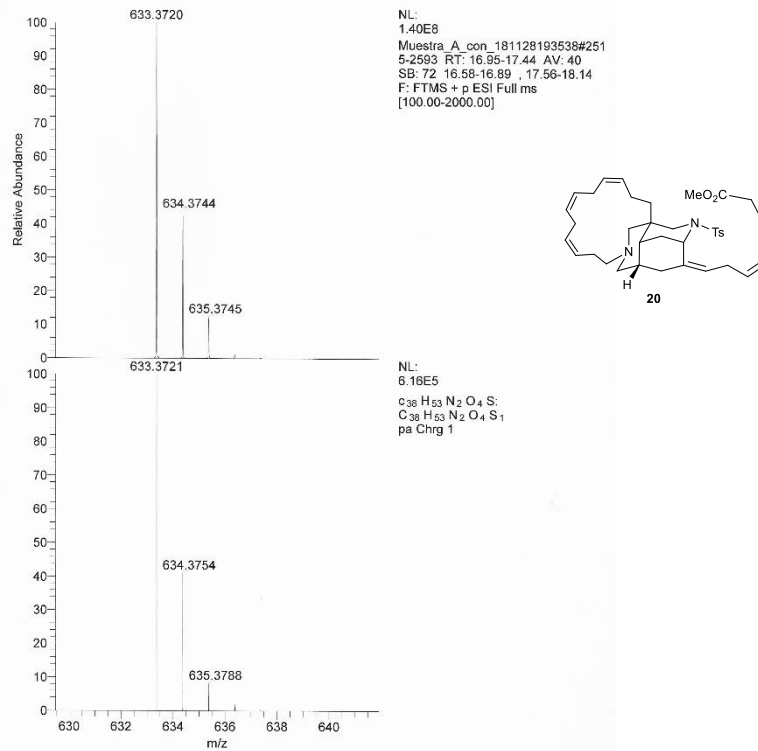

NL:  
6.16E5  
C<sub>38</sub>H<sub>53</sub>N<sub>2</sub>O<sub>4</sub>S;  
C<sub>38</sub>H<sub>53</sub>N<sub>2</sub>O<sub>4</sub>S;  
pa Chrg 1

Muestra\_B\_con#1430-1454 RT: 9.82-9.97 AV: 12 SB: 11 10.06-10.20 NL: 4.64E6  
F: FTMS + p ESI Full ms [100.00-2000.00]

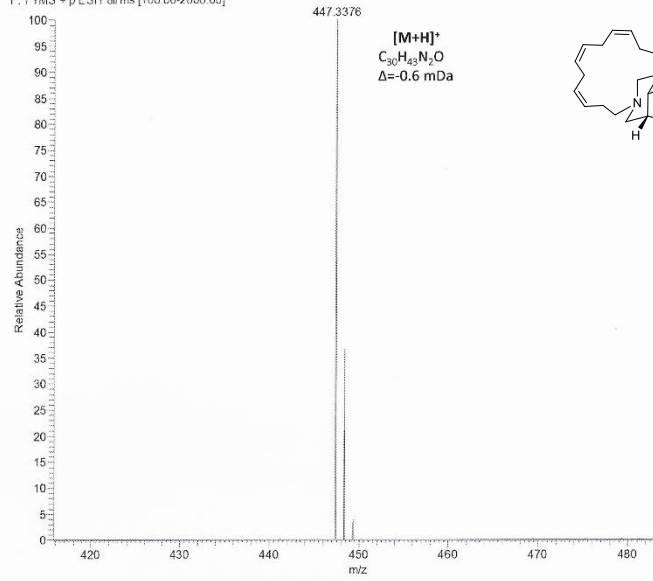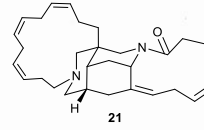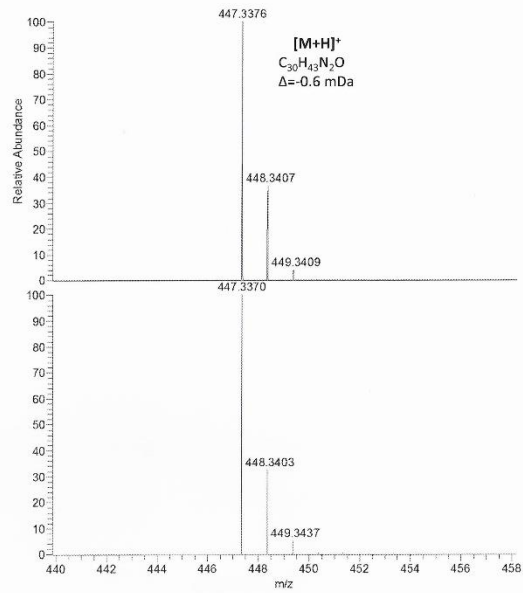

NL:  
4.64E6  
Muestra\_B\_con#1430-1454  
RT: 9.82-9.97 AV: 12 SB:  
11 10.06-10.20 F: FTMS +  
p ESI Full ms  
[100.00-2000.00]

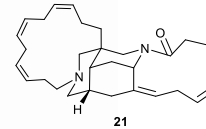

NL:  
7.14E5  
C<sub>30</sub>H<sub>43</sub>O N<sub>2</sub>  
C<sub>30</sub>H<sub>43</sub>O<sub>2</sub> N<sub>2</sub>  
pa Chrg 1
